# Supplementary material
Source: PubMed Central journal article supplement (PMC2746047)
Supplement: NIHMS138150-supplement-Supp_Fig_2.pdf [file NIHMS138150-supplement-Supp_Fig_2.pdf]

| Probes Set ID | Gene Symbol | mRNA Accession | H1299 cells w/ knockdown shRGS-2 | H1299 cells w/ knockdown shRGS-1 | Hct116 cells with vector control | Hct116 cells with RGS17 knockdown construct shRGS-1 | P_H1299_2.0 | P_H1299_3.0 | P_HCT116_3.0 | fold changes RGS17 knockdown/vector control | FOLD_H1299_2.0 | FOLD_HCT116_3.0 |
|---------------|-------------|----------------|----------------------------------|----------------------------------|----------------------------------|-----------------------------------------------------|-------------|-------------|--------------|---------------------------------------------|----------------|-----------------|
| 2891860       | ITGB8       | NM_002214      | 110.6326                         | 51.66708333                      | 445.0193333                      | 101.29039                                           | 0.02027206  | 0.467193775 | 0.645920401  | 0.645920401                                 | 0.227608965    |                 |
| 3132940       | ANKK1       | NM_020476      | 344.0208                         | 179.8145                         | 177.0607                         | 66.59567533                                         | 0.00125153  | 0.522684966 | 0.1615840864 | 0.1615840864                                | 0.376075277    |                 |
| 3577612       | SERPINA1    | NM_001002236   | 590.3627                         | 360.879                          | 171.9553                         | 66.62296333                                         | 0.001278252 | 0.611283538 | 0.553224145  | 0.553224145                                 | 0.367488569    |                 |
| 2596261       | FNT1        | NM_0212482     | 484.5203667                      | 263.1124                         | 296.0334                         | 90.96412                                            | 0.001023347 | 0.435139698 | 0.583931252  | 0.583931252                                 | 0.444912764    |                 |
| 2809245       | ITGA2       | NM_020182      | 511.1985333                      | 408.7182                         | 481.6174333                      | 22.86823667                                         | 0.00157892  | 0.514697095 | 0.579096732  | 0.579096732                                 | 0.474821613    |                 |
| 3359121       | INS-IGF2    | NM_003512      | 644.8593333                      | 408.7182                         | 211.4853                         | 106.41314                                           | 0.011766539 | 0.633813196 | 0.545210667  | 0.545210667                                 | 0.503170386    |                 |
| 2902958       | C4A         | NM_007293      | 169.1377                         | 102.2656667                      | 371.3725333                      | 200.7478667                                         | 0.00762671  | 0.604629581 | 0.406823099  | 0.406823099                                 | 0.552720088    |                 |
| 2792647       | SPOCK3      | NM_01040159    | 100.91372                        | 47.18798667                      | 47.1718667                       | 26.37424667                                         | 0.007340673 | 0.467607246 | 0.406823099  | 0.406823099                                 | 0.574946768    |                 |
| 2671767       | TMEM158     | NM_015444      | 1299.372                         | 784.4543                         | 435.7117333                      | 252.2868667                                         | 0.00470561  | 0.603718027 | 0.657563705  | 0.657563705                                 | 0.57902243     |                 |
| 2722823       | PCDH7       | NM_032456      | 225.5309667                      | 144.7101667                      | 68.44395667                      | 41.56173                                            | 0.006062613 | 0.641642116 | 0.507385638  | 0.507385638                                 | 0.607237396    |                 |
| 2525533       | MAP2        | NM_002374      | 813.3408333                      | 533.2041667                      | 384.3856                         | 127.85992                                           | 0.02806039  | 0.79257878  | 0.472600888  | 0.472600888                                 | 0.613580967    |                 |
| 2604390       | ARL4C       | NM_005737      | 744.0473667                      | 341.1064333                      | 169.9632                         | 107.3822367                                         | 0.00483657  | 0.45844989  | 0.496747765  | 0.496747765                                 | 0.631796981    |                 |
| 2956227       | PLA2G7      | NM_005084      | 161.7152333                      | 96.8171                          | 196.3321                         | 145.6167333                                         | 0.00400025  | 0.598888906 | 0.580156765  | 0.580156765                                 | 0.741668614    |                 |
| 3933205       | RIPK4       | NM_020639      | 371.155                          | 211.6574333                      | 163.7095                         | 129.4937667                                         | 0.002506058 | 0.525014246 | 0.596531032  | 0.596531032                                 | 0.790997264    |                 |
| 2717253       | SORCS2      | NM_020777      | 602.4069333                      | 350.8909333                      | 372.4701333                      | 31.49904667                                         | 0.00206303  | 0.570268989 | 0.621130884  | 0.621130884                                 | 0.81773866     |                 |
| 4004683       | SRPX        | NM_066307      | 203.2458                         | 110.8310667                      | 240.3374667                      | 197.7218333                                         | 0.00507322  | 0.582481565 | 0.618303198  | 0.618303198                                 | 0.822684187    |                 |
| 2635119       | BOC         | NM_033294      | 205.9501667                      | 127.7239667                      | 96.34456333                      | 44.76146667                                         | 0.00939985  | 0.544321736 | 0.474029747  | 0.474029747                                 | 0.850457328    |                 |
| 2496382       | GLIS3       | NM_001042413   | 559.6496333                      | 307.8698333                      | 133.9775333                      | 35.24609533                                         | 0.0069243   | 0.62016928  | 0.650242413  | 0.650242413                                 | 0.86890386     |                 |
| 3197140       | NLS2        | NM_002518      | 97.806236                        | 52.10234333                      | 300.1067667                      | 748.9140667                                         | 0.001397196 | 0.55011174  | 0.536240442  | 0.536240442                                 | 0.927116907    |                 |
| 3485674       | CENAI1      | NM_003914      | 487.414                          | 300.2176667                      | 25.95629667                      | 24.09174333                                         | 0.021568537 | 0.532709699 | 0.534995363  | 0.534995363                                 | 0.928165664    |                 |
| 2956052       | TNFRSF21    | NM_014452      | 487.414                          | 300.2176667                      | 882.3640333                      | 825.4434                                            | 0.009230454 | 0.371677427 | 0.615939769  | 0.615939769                                 | 0.93549076     |                 |
| 2850071       | LOC728937   | NM_001093731   | 481.5520667                      | 251.1992667                      | 247.4775333                      | 361.3514333                                         | 0.00257082  | 0.521643004 | 0.521643004  | 0.521643004                                 | 0.947547483    |                 |
| 2862696       | ENC1        | NM_003633      | 688.7651667                      | 432.1909                         | 570.9967333                      | 548.0827333                                         | 0.00597693  | 0.487829171 | 0.627468362  | 0.627468362                                 | 0.959870173    |                 |
| 2895792       | RNF182      | NM_152737      | 520.2677667                      | 253.8323                         | 237.233                          | 181.6425667                                         | 0.002146969 | 0.487869053 | 0.455964978  | 0.455964978                                 | 0.9700788      |                 |
| 3661684       | MMP2        | NM_004530      | 246.1194                         | 130.7645333                      | 143.5163333                      | 12.73353333                                         | 0.00290047  | 0.863427425 | 0.531305266  | 0.531305266                                 | 0.979979462    |                 |
| 3812864       | CBLN2       | NM_182511      | 201.5427                         | 108.9296767                      | 119.6917                         | 58.45228333                                         | 0.002297359 | 0.540479396 | 0.593877625  | 0.593877625                                 | 0.994940519    |                 |
| 3516639       | PCDH9       | NM_203487      | 159.0190667                      | 67.62086                         | 53.49757667                      | 12.76895733                                         | 0.00422288  | 0.985703823 | 0.425237435  | 0.425237435                                 | 1.013869147    |                 |
| 3740367       | SLC43A2     | NM_152346      | 325.141                          | 203.6785                         | 181.1472333                      | 191.0872333                                         | 0.00067431  | 0.7575652   | 0.626431302  | 0.626431302                                 | 1.054872491    |                 |

|         |            |              |             |              |             |             |             |             |              |              |             |              |
|---------|------------|--------------|-------------|--------------|-------------|-------------|-------------|-------------|--------------|--------------|-------------|--------------|
| 3222170 | TNC        | NM_002160    | 218.6368667 | 114.15821    | 106.9529733 | 22.2962867  | 23.90738667 | 0.000913584 | 0.760782978  | 0.522138142  | 0.489180873 | 1.0722327    |
| 2895113 | SLOCA1     | NM_005630    | 130.1535    | 67.48990667  | 69.71934667 | 22.7893833  | 24.57744333 | 0.006503191 | 0.753025041  | 0.518540851  | 0.536131158 | 1.078450754  |
| 3406329 | PTPRO      | NM_030667    | 255.9094    | 89.57457667  | 61.31865    | 11.1336933  | 12.84561    | 0.000335554 | 0.303415886  | 0.350024566  | 0.239610776 | 1.153772848  |
| 282947  | TGFB1      | NM_001358    | 2061.506667 | 936.1842     | 957.7075    | 6.331649333 | 11.83986833 | 0.000167098 | 0.367849384  | 0.454126205  | 0.464566673 | 1.869950105  |
| 2574720 | CYP27C1    | NM_001001665 | 110.3334667 | 78.98166333  | 69.70608333 | 14.67994267 | 5.110755333 | 0.002162577 | 0.204673703  | 0.715845026  | 0.631776427 | 0.348145456  |
| 3059464 | SEMA3A     | NM_006080    | 558.9769    | 433.5526333  | 326.6197    | 635.9800667 | 260.6354667 | 0.014505472 | 0.035689212  | 0.775618158  | 0.584316891 | 0.409817037  |
| 3557209 | SCTA8      | NM_012244    | 6.571654    | 7.788825667  | 2.07696417  | 328.7941667 | 154.7721667 | 0.067162996 | 0.00697231   | 1.184911084  | 0.316048923 | 0.47072662   |
| 3382216 | ARRB1      | NM_020251    | 123.7701667 | 111.3780233  | 76.43889667 | 554.82      | 288.6017    | 0.008062784 | 0.00302654   | 0.899877784  | 0.617595489 | 0.520171767  |
| 2336271 | BTF3L4     | NM_152265    | 1331.692667 | 1032.483533  | 869.4103    | 1142.896    | 600.1515333 | 0.05716911  | 0.02902471   | 0.775316677  | 0.652861071 | 0.525114738  |
| 3905145 | TGM2       | NM_04613     | 1186.057333 | 840.8734667  | 756.543     | 434.0593    | 228.4804    | 0.006501113 | 0.014353159  | 0.708965278  | 0.637863768 | 0.526380612  |
| 3959393 | SEMA3E     | NM_012431    | 442.4697667 | 313.6468333  | 173.8761333 | 28.1300533  | 14.81011667 | 0.01468007  | 0.056588866  | 0.708854835  | 0.392867263 | 0.52648733   |
| 3019793 | FOXP2      | NM_148899    | 230.967667  | 189.4682667  | 138.0986667 | 89.04557333 | 48.77205    | 0.030700439 | 0.04627073   | 0.863544722  | 0.597861387 | 0.547720096  |
| 2820394 | NRP2       | NM_005654    | 807.5661667 | 639.9399333  | 463.6768667 | 3184.31     | 1746.777333 | 0.001394532 | 0.00017355   | 0.791761666  | 0.574165791 | 0.548557563  |
| 2866225 | MEF2C      | NM_002387    | 745.0244667 | 541.26       | 465.4897    | 209.0163333 | 116.1454167 | 0.01569391  | 0.034330532  | 0.726499631  | 0.62479787  | 0.556676271  |
| 3771675 | ST6GALNAC2 | NM_006456    | 258.8280667 | 191.0890667  | 162.9981    | 260.0148333 | 151.16915   | 0.005121564 | 0.073095874  | 0.738285724  | 0.629754347 | 0.563395563  |
| 3570369 | C14orf49   | NM_152892    | 111.1214333 | 86.89422667  | 66.20767    | 65.9731333  | 38.22857333 | 0.05861939  | 0.094460894  | 0.7615975394 | 0.613812007 | 0.594565976  |
| 3197014 | GLIS3      | NM_001042413 | 415.2152    | 295.3951333  | 237.2843333 | 47.2527667  | 29.43880667 | 0.00160421  | 0.029475262  | 0.615086185  | 0.571474342 | 0.623014827  |
| 3288864 | MMP14      | NM_004895    | 427.4477667 | 352.7905667  | 270.6642333 | 101.9168967 | 164.1551    | 0.009813712 | 0.007368684  | 0.764202477  | 0.664496462 | 0.639204768  |
| 3219215 | KLF4       | NM_004235    | 1375.579333 | 1051.2211333 | 914.0676    | 211.1301    | 134.9553867 | 0.004046283 | 0.068393745  | 0.825341935  | 0.63210077  | 0.6789937908 |
| 3197805 | LAMC3      | NM_006059    | 165.8772333 | 155.5431     | 101.9168967 | 356.5491    | 112.8083333 | 0.012945818 | 0.008338532  | 0.93770011   | 0.614411602 | 0.687205779  |
| 3876245 | SNRP25     | NM_003081    | 516.3713667 | 405.9978     | 336.9129    | 17.25732667 | 12.28169033 | 0.025030904 | 0.37446059   | 0.786251574  | 0.652462388 | 0.711679773  |
| 2813060 | PIKR1      | NM_181523    | 331.5156667 | 265.4259     | 202.4750667 | 241.3583    | 171.9380667 | 0.00893512  | 0.041260057  | 0.80064361   | 0.610755651 | 0.712368569  |
| 3924144 | COL18A1    | NM_030582    | 731.7464    | 572.6400667  | 477.9356    | 577.1851    | 437.6375333 | 0.00778519  | 0.016647965  | 0.782577224  | 0.653143767 | 0.758227358  |
| 3252036 | PLAU       | NM_002658    | 1445.734    | 1180.461333  | 906.9892    | 562.7385    | 429.8481    | 0.029047327 | 0.0031483    | 0.816513503  | 0.627341682 | 0.763850527  |
| 3667508 | CALB2      | NM_001740    | 572.6165    | 443.5320667  | 356.7119667 | 307.0671    | 233.6014    | 0.031730154 | 0.102048336  | 0.774570881  | 0.622950905 | 0.6762263572 |
| 2371139 | LAMC2      | NM_005562    | 309.2285333 | 251.3721333  | 197.2797667 | 281.3433    | 218.5631667 | 0.007219305 | 0.013970133  | 0.812900836  | 0.637974008 | 0.776855773  |
| 3020273 | CAV2       | NM_001233    | 1018.827833 | 935.0961     | 570.2764333 | 1154.128    | 903.4968333 | 0.007219305 | 0.048196258  | 0.91781562   | 0.559737784 | 0.782839367  |
| 3104698 | ZBTB10     | NM_023929    | 1132.918    | 1120.4276    | 716.6969667 | 670.2129333 | 525.2866333 | 0.007219305 | 0.048196258  | 0.91781562   | 0.559737784 | 0.782839367  |
| 2694817 | PLXND1     | NM_015103    | 302.7393667 | 258.94       | 186.0254333 | 511.1508667 | 401.5834333 | 0.004784316 | 0.08019976   | 0.988975018  | 0.632611422 | 0.783760813  |
| 3489543 | KLF5       | NM_001730    | 200.9601333 | 246.5706667  | 175.9684    | 1192.85333  | 945.2319667 | 0.004784316 | 0.004784316  | 0.855323187  | 0.61447388  | 0.785645608  |
| 2872047 | SEMA6A     | NM_020796    | 139.1142667 | 96.56474     | 86.5076667  | 204.6797    | 163.4626667 | 0.002432002 | 0.056774027  | 0.694139734  | 0.621848202 | 0.798626667  |
| 4024160 | ATP11C     | NM_173684    | 146.9611    | 113.6325667  | 95.95152    | 303.3618    | 234.7177    | 0.02821353  | 0.13184775   | 0.77321527   | 0.380723334 | 0.639894531  |
| 2558612 | TGFA       | NM_003236    | 596.2411333 | 399.7961     | 364.3066    | 763.6052667 | 649.7728    | 0.001859399 | 0.022904788  | 0.670477224  | 0.61100548  | 0.850927604  |
| 3118818 | PTP4A3     | NM_032611    | 827.7528    | 657.177667   | 446.2702333 | 125.3475667 | 106.97086   | 0.000548158 | 0.1743339236 | 0.7893922735 | 0.539134671 | 0.853393699  |

|         |          |             |             |             |             |             |             |             |             |             |
|---------|----------|-------------|-------------|-------------|-------------|-------------|-------------|-------------|-------------|-------------|
| 2837970 | ADRA1B   | 291.7413667 | 263.6061    | 44.14450333 | 0.021015519 | 0.006801138 | 0.564625636 | 0.730522923 | 0.66007197  | 0.862001543 |
| 3346548 | BIRC3    | 1269.287667 | 914.7804333 | 111.7198667 | 0.045218921 | 0.006618937 | 0.288327633 | 0.789844472 | 0.575591476 | 0.867848541 |
| 2413203 | LRP8     | 636.6717333 | 397.2856333 | 995.9676667 | 0.223410366 | 0.007682925 | 0.098973096 | 0.896203339 | 0.624003882 | 0.901433447 |
| 2829905 | FBXL21   | 185.7063667 | 138.7140333 | 19.83086667 | 18.0224     | 0.004967454 | 0.734682443 | 0.746953569 | 0.639386992 | 0.908805465 |
| 3453436 | --       | 116.6145667 | 92.50259333 | 70.86168    | 0.174078961 | 0.00884505  | 0.875268536 | 0.793233607 | 0.607657191 | 0.934730005 |
| 3563861 | CDKL1    | 104.6137267 | 61.37692667 | 50.84972    | 0.07317034  | 0.008844505 | 0.724832249 | 0.811365194 | 0.586700509 | 0.938376239 |
| 3464984 | ATP2B1   | 891.3331667 | 765.3830333 | 578.8555333 | 0.274072296 | 0.005155591 | 0.408863536 | 0.683187204 | 0.586649206 | 0.945198301 |
| 2962383 | FAM46A   | 823.8147333 | 622.0036    | 424.2365    | 0.12457536  | 0.003833315 | 0.472789626 | 0.617481714 | 0.586649206 | 0.945198301 |
| 3920443 | ICAM1    | 726.1438667 | 614.4968333 | 46.45809    | 0.020479703 | 0.000679009 | 0.775809432 | 0.755028497 | 0.617481714 | 0.947785178 |
| 2437801 | ARHGFB2  | 1167.559667 | 717.7422667 | 382.4822333 | 0.034664827 | 0.000223445 | 0.744136725 | 0.846246676 | 0.608235301 | 0.949331107 |
| 3875899 | STK35    | 470.9177    | 495.6063333 | 540.6244    | 0.034156285 | 0.008923687 | 0.777052892 | 0.810694909 | 0.614737646 | 0.969433003 |
| 3952133 | CACNA1A  | 346.4695    | 278.4333667 | 44.3180233  | 0.063290601 | 0.008623674 | 0.995684895 | 1.052428641 | 0.654780372 | 0.974266114 |
| 3980758 | MED12    | 1496.321    | 990.648     | 592.574667  | 0.57687613  | 0.001813809 | 0.995684895 | 0.803647555 | 0.661671807 | 0.998680823 |
| 2947283 | ZSCAN12  | 163.2487667 | 101.8398667 | 32.2943033  | 0.001368027 | 0.001368027 | 0.247526032 | 0.969866092 | 0.662055802 | 1.085189324 |
| 3560789 | CRB      | 1104.555    | 1034.386033 | 164.8262    | 0.678470814 | 0.003608873 | 0.772183634 | 0.942101895 | 0.587879819 | 1.092083468 |
| 3106539 | OTUD8B   | 442.0267    | 402.524667  | 21.27       | 0.122779817 | 0.006808873 | 0.117395618 | 0.936473089 | 0.587363795 | 1.148617382 |
| 3493304 | IP08     | 292.8318    | 217.1988667 | 286.5913333 | 0.486013605 | 0.006225637 | 0.158066817 | 0.910627043 | 0.566136163 | 1.162981351 |
| 3824983 | GDF15    | 319.4541    | 163.0903333 | 2502.272667 | 0.284654015 | 0.007885199 | 0.216441684 | 0.892198052 | 0.661759632 | 1.16706274  |
| 3128046 | STC1     | 975.8721333 | 739.7972333 | 8.56606     | 0.430414213 | 0.024549461 | 0.00109413  | 1.0782826   | 0.647619241 | 1.207399114 |
| 2705164 | EIF5A2   | 768.8046667 | 739.7242    | 32.98249333 | 0.62031862  | 0.00882107  | 0.019832855 | 1.045895262 | 0.533959047 | 1.213312465 |
| 3117384 | KHDRBS3  | 282.0699667 | 158.8512    | 85.27816333 | 0.039834488 | 0.003485281 | 0.600555443 | 0.866275056 | 0.656712973 | 1.345858617 |
| 3407629 | SLOC1B3  | 186.1006667 | 158.8512    | 262.2158    | 0.000647169 | 0.00161337  | 0.368318524 | 0.676806177 | 0.651205605 | 1.40048741  |
| 2783715 | MAD2L1   | 72.68969333 | 46.5347134  | 174.7399333 | 0.667647244 | 0.000837805 | 0.156208856 | 1.076345715 | 0.562834351 | 1.430332558 |
| 3299469 | ANKRD22  | 7.159238    | 4.746614    | 104.8150867 | 0.301272956 | 0.027984413 | 0.007479048 | 0.665658465 | 0.567475207 | 1.501546438 |
| 2334602 | TSPAN1   | 162.3902333 | 104.97699   | 703.9752333 | 0.704662766 | 0.01399369  | 0.001399369 | 0.924739178 | 0.590814369 | 2.360064547 |
| 4017381 | TSC22D3  | 5.070652433 | 126.3399    | 703.9752333 | 0.454231515 | 0.556709007 | 0.002258342 | 0.663005476 | 0.746885912 | 0.414911054 |
| 3498502 | TM6SF2   | 1623.165667 | 1011.871333 | 280.1573333 | 0.001580348 | 0.086401807 | 0.001617715 | 0.646448914 | 0.778001838 | 0.417655223 |
| 3577078 | LCNN     | 982.7028333 | 598.1769    | 1853.474667 | 0.131307996 | 0.066075211 | 0.007687445 | 0.432364246 | 0.809755844 | 0.431734668 |
| 2817276 | --       | 532.8199333 | 502.8126    | 852.2793333 | 0.016585543 | 0.982359473 | 0.001521921 | 0.623393813 | 0.997811478 | 0.522740802 |
| 2460383 | EPAS1    | 103.36612   | 66.10095667 | 960.3657333 | 0.002639691 | 0.960653843 | 1.17701E+05 | 0.608705909 | 1.006444879 | 0.523829897 |
| 3250699 | EIF4EBP2 | 1789.623667 | 115.4455667 | 1660.236333 | 0.001631885 | 0.473235186 | 0.002297926 | 0.658881631 | 0.943682037 | 0.524522653 |
| 3451375 | PRICKLE1 | 230.9201333 | 384.5377667 | 147.9681333 | 0.242013267 | 0.005386359 | 0.004633139 | 0.639463775 | 1.116860792 | 0.566016099 |
|         |          |             |             |             | 0.007908371 | 0.239999356 | 0.04633139  | 0.638614338 | 1.095071385 | 0.618379567 |
|         |          |             |             |             | 0.00152673  | 0.793714219 | 0.037156519 | 0.591551752 | 0.965076488 | 0.629039631 |

|         |           |             |             |             |             |             |             |              |             |             |             |             |
|---------|-----------|-------------|-------------|-------------|-------------|-------------|-------------|--------------|-------------|-------------|-------------|-------------|
| 3260573 | NEBL      | 17.61963667 | 6.046623533 | 12.209225   | 288.7148667 | 169.5507    | 0.041381599 | 0.112823772  | 0.008868651 | 0.34328778  | 0.692932847 | 0.630968811 |
| 3666829 | BCKDK     | 935.6174667 | 579.7491667 | 920.6178333 | 372.0804    | 995.0163    | 0.000583    | 0.79917019   | 0.004561431 | 0.619642308 | 0.963968199 | 0.669821566 |
| 3588458 | THBS1     | 565.6783667 | 372.0804    | 875.1219333 | 307.4273333 | 211.0541    | 0.006391888 | 0.023040907  | 0.01104805  | 0.65759642  | 1.547030936 | 0.668516137 |
| 2897899 | SOX4      | 694.2649    | 454.2626    | 506.0147333 | 148.0091    | 1142.422    | 3.34691E-06 | 0.007866803  | 0.22314604  | 0.728949656 | 0.728949656 | 0.77180298  |
| 3605395 | ADAMTSL3  | 202.7875    | 114.778     | 147.3604333 | 25.01759667 | 19.31435333 | 0.006427008 | 0.019917083  | 0.263472593 | 0.664307311 | 0.726674146 | 0.772030727 |
| 2919669 | PRDM1     | 156.5645667 | 77.20905667 | 108.2998    | 74.5378333  | 60.09689    | 0.00163123  | 0.010007487  | 0.166059595 | 0.49314515  | 0.891726119 | 0.806282396 |
| 2356218 | ITGA10    | 120.1475667 | 69.42580667 | 97.80632    | 39.57418    | 31.98892933 | 0.006695254 | 0.032605884  | 0.659906121 | 0.577837809 | 0.814051609 | 0.808580982 |
| 3381817 | UCP2      | 696.5796    | 421.9614    | 614.4814333 | 265.500667  | 246.8294    | 0.000922094 | 0.021783983  | 0.32330447  | 0.606632799 | 0.883409222 | 0.929659848 |
| 3405748 | EMP1      | 808.7051333 | 502.5505    | 812.2218333 | 200.550333  | 201.0626667 | 0.00697272  | 0.943506442  | 0.982699637 | 0.621426128 | 1.004346557 | 1.002531142 |
| 3356539 | HNT       | 348.2755333 | 559.3778    | 525.0090333 | 33.51448667 | 39.87019333 | 0.011621672 | 0.002913222  | 0.168763843 | 1.606135793 | 1.507453103 | 1.189640579 |
| 3944210 | RASD2     | 38.57482667 | 45.17907    | 41.40514667 | 106.23664   | 40.76633333 | 0.1262099   | 0.141087696  | 0.006863102 | 1.015764609 | 1.657475493 | 0.383731749 |
| 3598758 | SMAD6     | 3415.744    | 219.5591667 | 58.95056333 | 291.7090333 | 119.2459733 | 0.004335986 | 0.004335986  | 0.003852338 | 1.17120604  | 1.528215638 | 0.408788162 |
| 3457444 | IGFBP6    | 195.0704    | 222.0590667 | 339.1638667 | 448.1323333 | 647.1280333 | 0.305159133 | 0.004335986  | 0.003852338 | 1.124507699 | 1.738698781 | 1.444055662 |
| 3980745 | FOXQ4     | 145.6121333 | 222.0590667 | 204.8406    | 197.7671667 | 143.9743    | 0.002675882 | 0.003242769  | 0.035816019 | 1.52501005  | 1.406759023 | 0.728013727 |
| 3315675 | IFTM1     | 121.0883    | 98.47738333 | 107.1775967 | 900.3604333 | 173.6616    | 0.046173715 | 0.343802188  | 0.000128713 | 0.813262471 | 0.885112034 | 0.192888311 |
| 2855285 | SEPP1     | 83.71607667 | 73.87460667 | 73.87460667 | 149.3741    | 31.18675333 | 0.287451939 | 0.433409849  | 0.001132123 | 0.847417208 | 0.85575469  | 0.206006343 |
| 2806643 | SLC1A3    | 109.5424667 | 103.6845    | 86.07141333 | 126.927     | 273.1364667 | 0.989335376 | 0.083673052  | 0.001066378 | 0.988485277 | 0.712249296 | 0.21541971  |
| 3331365 | SERPING1  | 11.76198133 | 8.976117    | 11.722592   | 396.6915333 | 117.0294667 | 0.499165255 | 0.985279001  | 0.004148906 | 0.76314668  | 0.785735721 | 0.295013775 |
| 2835676 | SYNPO     | 112.0924333 | 135.7651333 | 127.0086333 | 492.1945333 | 152.2579667 | 0.223438299 | 0.3585358186 | 0.001100971 | 1.211189099 | 0.986651131 | 0.309345099 |
| 3939875 | SUSD2     | 21.2191333  | 18.28305667 | 23.99364333 | 756.2132    | 244.1474667 | 0.696024434 | 0.826240305  | 0.00204347  | 0.861790717 | 1.02683486  | 0.322855336 |
| 3600283 | THSD4     | 427.9523333 | 333.8584    | 441.3024333 | 453.5152667 | 150.6131333 | 0.008624434 | 0.402140008  | 0.002191058 | 0.780166635 | 1.031243491 | 0.332101573 |
| 3395464 | ABCC      | 444.8363333 | 350.3691333 | 365.7469333 | 127.3512667 | 43.23187333 | 0.053426756 | 0.070847674  | 0.09726306  | 0.878636052 | 0.82220562  | 0.33946952  |
| 3726691 | ASCC3     | 346.5289667 | 283.6425333 | 292.3334667 | 894.6201667 | 315.4284667 | 0.029143291 | 0.050686467  | 0.001788817 | 0.818524743 | 0.843604705 | 0.35258144  |
| 2578790 | LRP1B     | 101.99751   | 80.2427     | 85.44209333 | 645.5119    | 228.7215    | 0.064828465 | 0.212357444  | 0.003045329 | 0.766712342 | 0.837688031 | 0.354325768 |
| 3432438 | OAS1      | 35.56055667 | 32.1226     | 26.60564    | 118.4152333 | 44.69931333 | 0.537104317 | 0.105293973  | 0.003213534 | 0.903321067 | 0.748178389 | 0.377479418 |
| 3061438 | SAMD9     | 139.0402667 | 194.9806333 | 165.4421333 | 288.902667  | 110.8722767 | 0.077687199 | 0.204340543  | 0.005158816 | 1.40233213  | 1.333729701 | 0.383770878 |
| 3837257 | CSAR1     | 64.28182    | 57.26585333 | 57.26585333 | 347.5616333 | 133.6199    | 0.717840946 | 0.882657333  | 0.000770974 | 1.094989899 | 0.975478463 | 0.384449511 |
| 2974330 | CTGF      | 1458.807667 | 116.7148333 | 1458.807667 | 116.7148333 | 47.00521667 | 0.094636008 | 0.171981468  | 0.007393699 | 1.169083694 | 1.180770465 | 0.402735585 |
| 3414739 | METTL7A   | 40.85589667 | 37.34641333 | 42.74636    | 232.9671667 | 84.2840667  | 0.619174426 | 0.758003372  | 0.001607697 | 0.914100935 | 1.046271483 | 0.404711136 |
| 2397217 | C16orf175 | 82.33467667 | 85.90051    | 56.29803333 | 216.1178    | 87.96736333 | 0.7319364   | 0.028427069  | 0.00031189  | 1.043039001 | 0.683778625 | 0.407034327 |
| 2516286 | IGCAP2    | 184.7655333 | 181.08001   | 185.4131667 | 127.2289533 | 52.22140333 | 0.834013003 | 0.983036291  | 0.002358378 | 0.980053489 | 1.003505163 | 0.410255564 |
| 2794584 | GNM6A     | 320.3099667 | 328.5228333 | 333.9062    | 184.8606667 | 75.98529    | 0.816288379 | 0.648227167  | 0.005390737 | 1.025477095 | 1.042281116 | 0.411027756 |
| 3479438 | CHFR      | 468.7440333 | 341.9891    | 466.3212667 | 23.86327333 | 9.886499113 | 0.003652335 | 0.863357158  | 0.162218479 | 0.729586033 | 0.994831365 |             |

|         |           |                  |             |             |             |             |             |             |              |             |             |              |             |
|---------|-----------|------------------|-------------|-------------|-------------|-------------|-------------|-------------|--------------|-------------|-------------|--------------|-------------|
| 3730322 | MRC2      | NM_006039        | 638.3884667 | 545.9710667 | 484.1977333 | 288.8970333 | 107.3671893 | 0.028914489 | 0.008341515  | 0.000531589 | 0.85523287  | 0.758468799  | 0.415030632 |
| 3387259 | SESN3     | NM_144665        | 163.0613333 | 185.6118    | 172.3756667 | 414.3173333 | 172.7881333 | 0.07621824  | 0.66770297   | 0.004591573 | 1.138294384 | 1.057133308  | 0.417045592 |
| 3610988 | IGFIR     | NM_000875        | 288.6713    | 273.3793333 | 327.2461    | 293.8079333 | 123.0030333 | 0.458629884 | 0.194891839  | 0.00739889  | 0.947007664 | 1.133628802  | 0.418651164 |
| 2882098 | SPARC     | NM_003118        | 117.06655   | 91.47101667 | 82.75497333 | 273.4963333 | 114.7741567 | 0.085918457 | 0.055975545  | 0.00466219  | 0.781359122 | 0.706905374  | 0.419655193 |
| 3974019 | TSPAN7    | NM_004615        | 51.23672    | 47.4106667  | 37.26727    | 321.7113667 | 135.8441667 | 0.556735953 | 0.113974287  | 0.0093413   | 0.925431344 | 0.727354717  | 0.422254793 |
| 3907190 | SLPI      | NM_003064        | 30.53186333 | 23.5306     | 28.81512333 | 86.90711    | 37.14699333 | 0.327106001 | 0.657118947  | 0.007222917 | 0.770688943 | 0.943772184  | 0.427433306 |
| 2403261 | IF16      | NM_022872        | 700.0444    | 736.4258667 | 635.2888667 | 1472.365333 | 633.6782333 | 0.588122197 | 0.115500108  | 0.01236172  | 1.051970227 | 0.907497963  | 0.430375269 |
| 2638962 | DTX3L     | NM_138287        | 274.5271    | 323.9613333 | 247.9081333 | 332.5739    | 143.2696667 | 0.405194307 | 0.605865228  | 0.003371208 | 1.180070504 | 0.903037017  | 0.43079047  |
| 2680591 | LRIG1     | NM_009667        | 157.5689667 | 135.6989667 | 124.7639333 | 122.1631667 | 53.33814667 | 0.018418286 | 0.018325235  | 0.002755009 | 0.861094336 | 0.791704749  | 0.436613982 |
| 3445326 | GRIN2B    | NM_000834        | 43.15913    | 44.47841    | 51.33888    | 222.3463667 | 97.18324333 | 0.793622841 | 0.13508101   | 0.020272703 | 1.030567808 | 1.189525368  | 0.437808042 |
| 3949293 | NCAM1     | NM_181351        | 26.76588333 | 27.92666333 | 38.00547    | 89.32288667 | 39.10908667 | 0.832152527 | 0.442221614  | 0.002044833 | 1.043364158 | 0.9795792405 | 0.437840465 |
| 3190190 | LCN2      | NM_005564        | 38.48488    | 41.13168333 | 38.00547    | 151.8502    | 66.69682333 | 0.615878633 | 0.931674409  | 0.03012889  | 1.068775148 | 0.9875429    | 0.439227761 |
| 3549740 | SERPINA5  | NM_000624        | 34.81879667 | 37.99718333 | 45.90890333 | 516.8039333 | 66.69682333 | 0.562768522 | 0.658724847  | 0.007902185 | 0.921957352 | 0.958384948  | 0.442702575 |
| 2878943 | PCDH1     | NM_032420        | 47.27540333 | 43.5821     | 45.90890333 | 42.99776    | 235.7192667 | 0.390091963 | 0.837018977  | 0.01939108  | 0.921957352 | 0.824900847  | 0.456037083 |
| 2714407 | IDUA      | NM_000203        | 324.7426667 | 295.8282333 | 267.8805333 | 412.8822    | 180.628     | 0.285454153 | 0.017488075  | 0.01180103  | 0.910555854 | 0.461700688  | 0.461700688 |
| 3420151 | MSRB3     | NM_001031679     | 429.9451    | 479.3116333 | 502.8434667 | 114.1928233 | 52.86428333 | 0.130636803 | 0.134691688  | 0.003572452 | 1.115598975 | 1.170368374  | 0.462824693 |
| 3238516 | CAMK1D    | NM_153488        | 115.2506    | 109.2890667 | 124.5875    | 215.8541    | 100.0195333 | 0.590437762 | 0.659393251  | 0.004054316 | 0.948273289 | 1.091013895  | 0.466366382 |
| 3085244 | RASA4     | NM_006986        | 162.9070333 | 174.7144667 | 125.63702   | 153.2057    | 71.53848333 | 0.441338913 | 0.17393361   | 0.005122318 | 1.07247958  | 0.771219127  | 0.466944066 |
| 3836289 | --        | ENST000000324688 | 116.1154333 | 134.5094333 | 117.5932367 | 96.1785     | 45.04863867 | 0.105249755 | 0.916663775  | 0.005870815 | 1.184411328 | 1.012727019  | 0.468385727 |
| 2452187 | LRRN2     | NM_006338        | 391.89993   | 38.78831667 | 33.98991333 | 123.5709333 | 58.03266    | 0.863395562 | 0.619785201  | 1.08396E-05 | 0.989752129 | 0.852002372  | 0.468630345 |
| 3919033 | SLC5A3    | NM_006833        | 434.4065    | 407.5805333 | 413.6781    | 1140.530333 | 539.3094    | 0.361332261 | 0.537582961  | 0.00768051  | 0.938246657 | 0.952283403  | 0.472858445 |
| 3250237 | HKDC1     | NM_025130        | 55.59331    | 41.00993333 | 53.90027    | 271.6245667 | 129.7101    | 0.257279397 | 0.743156588  | 0.00303141  | 0.737677489 | 0.969545976  | 0.477534494 |
| 2364677 | PBX1      | NM_002585        | 58.49206667 | 55.52021333 | 59.3285     | 1453.254    | 699.4154667 | 0.762064737 | 0.954249589  | 0.01904193  | 0.949192198 | 1.014299945  | 0.481275446 |
| 3841102 | PRKCG     | NM_002739        | 73.08813667 | 83.16183333 | 63.28314667 | 151.3356667 | 72.97213333 | 0.166376869 | 0.345193391  | 0.008385092 | 1.137823279 | 0.865847038  | 0.482187729 |
| 3353914 | LOH1TCRZA | NM_014622        | 228.2374333 | 288.8781333 | 317.3694333 | 293.4091667 | 142.1398667 | 0.080750929 | 0.109841578  | 0.000224529 | 1.265691298 | 1.390523144  | 0.484442488 |
| 3348790 | DIXD1     | NM_01037954      | 163.4591667 | 119.5268333 | 191.3793333 | 190.9711667 | 92.76050333 | 0.002294563 | 0.407926517  | 0.00843822  | 0.731233359 | 1.170798639  | 0.485730411 |
| 2791197 | PDGFC     | NM_016205        | 508.4145    | 474.5762667 | 422.7656667 | 449.4958    | 218.6878333 | 0.506421703 | 0.204382155  | 0.01032799  | 0.933050231 | 0.831539357  | 0.486518079 |
| 3049522 | TNS3      | NM_022748        | 365.3547    | 296.6093    | 321.2255667 | 417.9394333 | 203.4718    | 0.188745961 | 0.191050198  | 0.003992408 | 0.811839289 | 0.879215641  | 0.486846348 |
| 3610804 | IGFIR     | NM_000875        | 648.7995    | 667.3350333 | 792.0268333 | 679.4940333 | 332.6341333 | 0.750528258 | 0.037739464  | 0.002197453 | 1.025568897 | 1.220757466  | 0.488532089 |
| 3671727 | ATP2C2    | NM_014861        | 255.3931    | 219.1649667 | 259.1102667 | 433.3035667 | 213.6378333 | 0.051302976 | 0.708924835  | 0.003340095 | 0.858145215 | 0.987145959  | 0.493042363 |
| 3190242 | DNM1      | NM_001005336     | 216.6687667 | 215.5598667 | 148.1318333 | 190.5396333 | 93.97126667 | 0.842198906 | 0.002079115  | 0.008227557 | 0.89488205  | 0.683878758  | 0.493184882 |
| 3423622 | SYT1      | NM_005639        | 537.3079333 | 444.2149333 | 441.1990333 | 1334.196    | 660.2637667 | 0.028613016 | 0.038919686  | 0.000361566 | 0.826741161 | 0.821128828  | 0.494682476 |
| 2337407 | PCSK9     | NM_174896        | 59.88442667 | 59.01048333 | 74.52273667 | 1937.920667 | 960.0633    | 0.923663451 | 0.0534589739 | 0.000636243 | 0.985406167 | 1.244442684  | 0.495408968 |
| 2337716 | PRKAA2    | NM_006252        | 313.8620667 | 254.3446333 | 271.2309333 | 246.9040667 | 123.1171    | 0.173187044 | 0.372835359  | 0.003165516 | 0.810319099 | 0.86411733   | 0.498643468 |

|         |          |                |             |             |             |              |             |             |             |             |             |              |              |
|---------|----------|----------------|-------------|-------------|-------------|--------------|-------------|-------------|-------------|-------------|-------------|--------------|--------------|
| 3282601 | MPP7     | NM_173466      | 46.62556333 | 46.51951333 | 52.2064     | 2309.841667  | 1166.554667 | 0.975531007 | 0.34689016  | 0.000198962 | 0.987698809 | 1.119670769  | 0.505036637  |
| 3942141 | RPL28    | NM_000991      | 564.9792333 | 718.4253333 | 707.8394    | 1081.9041    | 547.1678667 | 0.167561474 | 0.063184857 | 0.004415178 | 1.271603008 | 1.252859146  | 0.505745257  |
| 3989273 | CASP4    | NM_033306      | 403.8764    | 567.0905333 | 509.2194667 | 138.7194333  | 70.38028667 | 0.000140129 | 0.064932175 | 0.003930468 | 1.404119016 | 1.260829663  | 0.507360161  |
| 3442812 | FLJ0650  | NM_153449      | 667.6755667 | 635.0922333 | 616.0778333 | 179.5477     | 91.47066    | 0.527365172 | 2.01298E-05 | 2.01298E-05 | 0.951198853 | 0.922720351  | 0.509452455  |
| 2824902 | SLC2A14  | NM_173800      | 171.7697333 | 194.0053667 | 184.0677    | 45.04677     | 23.01699667 | 0.474157984 | 0.541464887 | 0.007189094 | 1.071595656 | 1.071595656  | 0.510957759  |
| 3282519 | ARMC4    | NM_018076      | 248.9241    | 268.3971667 | 275.5471    | 567.9875     | 290.3533667 | 0.554692028 | 0.190002271 | 0.001154558 | 1.078228933 | 1.106895228  | 0.511187755  |
| 3261923 | AS3MT    | NM_020682      | 38.21834333 | 40.39572333 | 39.92115    | 126.0323333  | 64.96401667 | 0.647256465 | 0.351544823 | 0.00649258  | 1.066972119 | 1.0445454696 | 0.5115455161 |
| 2325479 | RCAN3    | NM_013441      | 317.2834667 | 230.2191333 | 270.2679333 | 336.3763333  | 173.6545333 | 0.100640002 | 0.314883012 | 0.003389738 | 0.725594484 | 0.851818521  | 0.516247628  |
| 3188883 | OLFML2A  | NM_182487      | 127.8752333 | 106.8394433 | 108.7223    | 116.3963     | 56.09491667 | 0.178764051 | 0.043889012 | 0.003389738 | 0.835489723 | 0.717901408  | 0.519055338  |
| 3861413 | MAP4K1   | NM_001042600   | 92.09806667 | 90.67391333 | 90.7723     | 116.3963     | 60.61301667 | 0.909802281 | 0.165621248 | 0.005698674 | 0.984536342 | 1.180505523  | 0.520746937  |
| 3187686 | GSN      | NM_000177      | 277.6623    | 249.3185    | 241.5244    | 1244.096667  | 650.3598    | 0.058916608 | 0.09040787  | 0.00253155  | 0.897919883 | 0.869849454  | 0.522760847  |
| 3634811 | CTSH     | NM_004390      | 231.5036667 | 223.0454667 | 225.6026    | 728.2656     | 380.7461667 | 0.514661151 | 0.82395534  | 0.00606697  | 0.963464078 | 0.974509835  | 0.522812236  |
| 3162529 | C9orf150 | NM_203403      | 306.8167333 | 384.1884667 | 213.9488    | 348.9272     | 184.6649667 | 0.042983908 | 0.009215115 | 0.000312059 | 1.252175729 | 0.697317899  | 0.529236276  |
| 2867242 | CHST10   | NM_004854      | 442.1481667 | 494.4949667 | 445.8481333 | 44.4517667   | 23.64089    | 0.23015815  | 0.931455751 | 0.008705916 | 1.118391987 | 1.00838816   | 0.531832765  |
| 3945614 | AFOBEC3F | NM_145288      | 218.6724    | 222.1928333 | 214.7726    | 302.1551667  | 160.7535    | 0.81868803  | 0.888601594 | 0.062168976 | 1.016699121 | 0.982168016  | 0.532017724  |
| 3906631 | PREX1    | NM_020620      | 76.50590333 | 70.5519333  | 81.7746667  | 241.0864     | 128.6989667 | 0.306070743 | 0.397234236 | 0.005040003 | 0.922135729 | 1.147161476  | 0.533829227  |
| 3549575 | IFZ7     | NM_005532      | 81.7746667  | 92.5762333  | 82.54694    | 163.5634     | 87.45371    | 0.438693502 | 0.741299662 | 0.007242407 | 1.152090501 | 1.009443919  | 0.534612375  |
| 2769492 | ---      | ENS10000381929 | 375.9545333 | 353.3323    | 341.9888333 | 481.071667   | 257.4087667 | 0.638650344 | 0.349472977 | 0.003490737 | 0.939872709 | 0.909703161  | 0.535088633  |
| 3076932 | PARP12   | NM_022750      | 624.9061667 | 566.530333  | 532.4484333 | 478.5667333  | 256.1254333 | 0.206958709 | 0.103816891 | 0.009011819 | 0.906592163 | 0.852045414  | 0.535190487  |
| 3980835 | NLGN3    | NM_018877      | 126.9361333 | 155.9766667 | 122.0361667 | 152.262667   | 81.5865     | 0.077764844 | 0.663540978 | 0.0025109   | 1.228796424 | 0.961398173  | 0.538814674  |
| 3339406 | FOLR1    | NM_016730      | 65.34156667 | 63.11688667 | 58.5597333  | 252.8112     | 136.0067333 | 0.816614703 | 0.650741046 | 0.000416224 | 0.896194204 | 0.896194204  | 0.537977484  |
| 3565206 | BMP4     | NM_001202      | 46.2668     | 44.00719667 | 43.6785333  | 311.3388     | 1683.625333 | 0.618991833 | 0.657457966 | 0.001992163 | 0.951161452 | 0.944057798  | 0.540248946  |
| 2971801 | MAN1A1   | NM_005907      | 808.8645    | 909.4622333 | 709.6825    | 1702.228     | 924.7067333 | 0.020410217 | 0.166491984 | 0.003564284 | 1.122980737 | 0.87627313   | 0.543233182  |
| 3008220 | CLIP2    | NM_003388      | 328.5469    | 355.8429333 | 322.3273    | 502.2757333  | 274.6852    | 0.415669386 | 0.650259944 | 0.005698752 | 1.07979451  | 0.978092344  | 0.546881288  |
| 3678462 | PPL      | NM_002705      | 241.2206333 | 285.4273    | 307.2324    | 588.4396667  | 305.5451333 | 0.13326649  | 0.067755061 | 0.00310658  | 1.183262377 | 1.273652715  | 0.547143459  |
| 2750627 | CPE      | NM_001873      | 462.9604    | 423.506     | 373.0986333 | 566.3322667  | 311.2412333 | 0.431324831 | 0.313656052 | 0.001027862 | 0.914778024 | 0.805900101  | 0.549573548  |
| 2495943 | PROM2    | NM_144707      | 93.51453667 | 91.03298333 | 100.1985833 | 294.7531     | 162.0194333 | 0.785946423 | 0.307173691 | 5.66207E-05 | 0.973463448 | 1.071476018  | 0.549678471  |
| 3772661 | TIMP2    | NM_003255      | 1756.062667 | 1406.983    | 1432.375    | 157.9112     | 868.8652333 | 0.051404874 | 0.054686055 | 0.002006383 | 0.801214573 | 0.815674194  | 0.549945335  |
| 3561039 | NFKBIA   | NM_020529      | 709.749     | 650.2059    | 654.6589    | 809.2769667  | 445.1848    | 0.374275585 | 0.065257987 | 0.001091218 | 0.916108821 | 0.795575478  | 0.551337575  |
| 2383989 | OBSCN    | NM_052843      | 129.4005333 | 115.0989667 | 105.2882767 | 283.9357     | 162.7194    | 0.468871737 | 0.258478063 | 0.00617354  | 0.882569479 | 0.813430006  | 0.553688421  |
| 3752709 | MYO1D    | NM_015194      | 10.73467067 | 8.241829    | 10.75245033 | 111.0563     | 617.4042667 | 0.608279352 | 0.997505759 | 0.008662828 | 0.767776605 | 1.001656284  | 0.556938084  |
| 3946953 | PPARA    | NM_005036      | 121.6809333 | 154.137333  | 146.5547333 | 214.6216333  | 119.3989333 | 0.084694483 | 0.153208589 | 0.008317942 | 1.266598977 | 1.204319248  | 0.556632163  |
| 3947227 | ---      | NM_019106      | 135.0322667 | 127.7811    | 138.8803    | 315.7207667  | 175.7403333 | 0.660164901 | 0.832371552 | 0.005358613 | 0.946300489 | 1.028497139  | 0.556632163  |
| 2592288 | STAT1    | NM_007315      | 889.3026333 | 941.5202333 | 820.4393333 | 1529.5563667 | 853.6660667 | 0.562845795 | 0.253315423 | 1.38131E-05 | 1.058717469 | 0.9228558758 | 0.558110943  |

|         |            |                 |             |             |             |              |              |             |             |             |             |             |              |
|---------|------------|-----------------|-------------|-------------|-------------|--------------|--------------|-------------|-------------|-------------|-------------|-------------|--------------|
| 3895152 | FAM113A    | ENST00000360852 | 560.3473    | 567.8879333 | 588.6095333 | 289.6122867  | 161.6682333  | 0.86671872  | 0.541202799 | 0.008852892 | 1.03457071  | 1.050436994 | 0.558223017  |
| 3243846 | RET        |                 | 39.25898    | 49.94997    | 46.51409667 | 219.9114867  | 123.8402     | 0.218787912 | 0.407661161 | 0.00493744  | 1.289772419 | 1.184801496 | 0.56313662   |
| 3517793 | KLF12      |                 | 476.7648    | 404.5443333 | 387.2657333 | 355.2788     | 200.1398     | 0.062022982 | 0.057524272 | 0.002499322 | 0.848519717 | 0.812276387 | 0.563331671  |
| 3833777 | BCAM       |                 | 639.8696333 | 697.8385333 | 544.5233667 | 429.3664333  | 242.4974333  | 0.013749836 | 0.002693007 | 0.043298021 | 1.080964507 | 0.850964507 | 0.564779672  |
| 2973694 | ARHGAP18   |                 | 329.3459333 | 390.2418667 | 345.2559667 | 156.6786     | 888.1827333  | 0.205775518 | 0.709534604 | 0.003579257 | 1.184899606 | 1.048307097 | 0.566882331  |
| 3870533 | TMCD       |                 | 131.1936333 | 111.2173333 | 123.3116667 | 152.4914     | 865.6008333  | 0.132689593 | 0.579838501 | 0.00229527  | 0.847734227 | 0.939921119 | 0.567639115  |
| 3997738 | ARSD       |                 | 219.1099    | 214.9517667 | 184.5387667 | 241.0631667  | 137.0666333  | 0.726895717 | 0.448387971 | 0.002689781 | 0.981022613 | 0.842220122 | 0.568592188  |
| 3339971 | PLEKHB1    |                 | 158.0078667 | 130.2651667 | 122.88976   | 567.6361333  | 324.0590333  | 0.112679455 | 0.140775115 | 0.001354311 | 0.824422033 | 0.777807856 | 0.570892187  |
| 2908261 | MGC45481   |                 | 60.63895333 | 62.67676    | 67.31883    | 582.5997     | 332.6196333  | 0.782203317 | 0.448871634 | 0.00189761  | 1.110158179 | 0.77807856  | 0.570923111  |
| 3761164 | SKAP1      |                 | 20.14244333 | 20.43754667 | 25.78457    | 138.6312     | 79.20524333  | 0.936742236 | 0.181498723 | 0.008020566 | 1.014650821 | 1.280111334 | 0.571337789  |
| 3893141 | PILP       |                 | 187.6671333 | 156.7277333 | 180.7671333 | 243.5608333  | 139.2553667  | 0.04290805  | 0.560224561 | 0.007353986 | 0.83504783  | 0.963130131 | 0.571747784  |
| 3986261 | RNF128     |                 | 146.0946667 | 167.5030333 | 113.9223333 | 130.6251     | 74.69571333  | 0.102672874 | 0.150837145 | 0.003241487 | 0.735845297 | 0.779783656 | 0.571832774  |
| 3787855 | LIPG       |                 | 20.11436667 | 16.47963333 | 17.77683667 | 211.9032     | 121.2015333  | 0.338593913 | 0.528915703 | 0.008405053 | 0.893788039 | 0.883788039 | 0.571966508  |
| 2830881 | EGF1       |                 | 444.9185333 | 319.0811    | 480.1949333 | 1591.7573333 | 870.4294333  | 0.018258429 | 0.096204346 | 0.008371444 | 1.076987324 | 1.076987324 | 0.571986843  |
| 3457686 | USP52      |                 | 582.8026    | 691.0630333 | 752.1188333 | 759.7353333  | 434.7347667  | 0.036168473 | 0.028685062 | 0.007743951 | 1.185758323 | 1.280520886 | 0.572218702  |
| 3896034 | RASPF2     |                 | 107.3531333 | 94.22703333 | 73.6894333  | 187.4717     | 107.7201367  | 0.116972464 | 0.080487923 | 0.009956593 | 0.877723688 | 0.686472216 | 0.574394121  |
| 3770512 | ---        |                 | 126.6543    | 125.3819333 | 117.6266667 | 496.575      | 286.6944333  | 0.981275643 | 0.40482895  | 0.002152632 | 0.967632413 | 0.936113342 | 0.575027686  |
| 2903285 | PSMB9      | ENST00000389812 | 462.2095667 | 450.8205333 | 370.5073667 | 419.7549     | 242.0241667  | 0.74189916  | 0.017431823 | 0.002028819 | 0.975359589 | 0.801600385 | 0.576584494  |
| 2822215 | PAM        |                 | 579.7661333 | 558.3409    | 484.9872    | 687.5115667  | 397.2204     | 0.847161248 | 0.330591934 | 0.003624905 | 0.963011821 | 1.19574472  | 0.577765407  |
| 2707876 | LAMP3      |                 | 428.9275333 | 555.0931667 | 512.8878333 | 159.0955     | 91.98105     | 0.142077086 | 0.123487296 | 0.007634974 | 1.284142072 | 1.19574472  | 0.578148916  |
| 2342738 | ST6GALNAC3 |                 | 153.6075333 | 177.1960333 | 159.4523667 | 104.1456333  | 60.51378333  | 0.353817091 | 0.594490656 | 0.003595308 | 1.038050434 | 1.038050434 | 0.581049646  |
| 3323891 | GAS2       |                 | 62.50282333 | 66.27232667 | 56.75964333 | 68.3127      | 38.74088333  | 0.329490557 | 0.318758196 | 0.006972749 | 0.908113271 | 0.908113271 | 0.581710647  |
| 3432090 | ALDH2      |                 | 255.4478    | 319.5641333 | 297.1948333 | 931.6906333  | 542.4393667  | 0.039877814 | 0.122808398 | 0.002392697 | 1.250995833 | 1.163426866 | 0.582209746  |
| 2885304 | PROS1      |                 | 506.4508667 | 588.1351333 | 448.9420333 | 364.9378667  | 212.6198333  | 0.27805285  | 0.117041689 | 0.00284462  | 1.161287643 | 0.896447359 | 0.582261927  |
| 2427898 | OVGP1      |                 | 95.74062667 | 118.5042267 | 110.3464    | 529.0505333  | 309.2031333  | 0.14908019  | 0.255760149 | 0.002877148 | 1.237763223 | 1.152555648 | 0.584449148  |
| 3651478 | ACSM3      |                 | 12.67373733 | 12.65428333 | 12.56549033 | 315.6676667  | 185.0179     | 0.998279711 | 0.980506539 | 0.000222281 | 0.988465015 | 0.991458952 | 0.586116095  |
| 3626555 | ADAM10     |                 | 818.4774667 | 864.1103333 | 789.8492333 | 1147.847333  | 674.7270667  | 0.632924282 | 0.78263913  | 0.004242444 | 0.965022576 | 0.965022576 | 0.587819518  |
| 3971806 | SAT1       |                 | 125.4305667 | 131.0967333 | 145.8979333 | 316.0165     | 281.0.548667 | 0.225209032 | 0.03426773  | 0.000632292 | 1.028437842 | 0.799374196 | 0.588463942  |
| 3272566 | KND1C1     |                 | 824.4829333 | 747.725667  | 770.9748    | 4767.974667  | 186.4978667  | 0.493168417 | 0.111263732 | 0.003411123 | 1.045173731 | 1.183178865 | 0.590152624  |
| 3352948 | SORL1      |                 | 81.41809667 | 79.47251667 | 690.6046667 | 407.6371667  | 407.6371667  | 0.197463531 | 0.488286358 | 0.003705274 | 0.906595924 | 0.935100881 | 0.590251069  |
| 3840039 | C3         |                 | 172.8907333 | 176.8624667 | 176.3481667 | 175.0735333  | 103.5894     | 0.876612568 | 0.746630789 | 0.00622394  | 1.049104123 | 1.049104123 | 0.5916891065 |
| 3764527 | ---        |                 | 131.5395333 | 122.9746333 | 159.2032667 | 256.3452     | 223.2316333  | 0.788644745 | 0.845936927 | 0.008079412 | 1.019897794 | 1.019897794 | 0.592970191  |
| 3457101 | ITGA7      |                 |             |             |             |              | 152.3940333  | 0.069521975 | 0.171712588 | 0.000152421 | 0.934887296 | 1.21030737  | 0.594487563  |

|         |          |             |             |             |             |              |              |             |             |             |              |
|---------|----------|-------------|-------------|-------------|-------------|--------------|--------------|-------------|-------------|-------------|--------------|
| 2408681 | HIVEP3   | 201.2461333 | 151.3898    | 324.0115687 | 192.8433333 | 0.0059506628 | 0.059410652  | 0.10681443  | 0.753484291 | 0.752261907 | 0.595174226  |
| 3188111 | PTGS1    | 78.12813333 | 64.84482    | 191.9022    | 114.52305   | 0.551533703  | 0.228623065  | 0.004158971 | 0.931833907 | 0.829980408 | 0.596778203  |
| 3867458 | PLEKH4A  | 101.2085433 | 87.24977    | 238.394667  | 142.2869    | 0.263800584  | 0.928185139  | 0.0065055   | 0.862079101 | 1.016342527 | 0.5968854877 |
| 3870361 | NLRP12   | 82.96983    | 88.61109667 | 105.5706267 | 63.04979333 | 0.804514613  | 0.789198006  | 0.066228754 | 0.953116669 | 1.055668991 | 0.59722856   |
| 3865223 | TRAPPC6A | 211.9057333 | 248.3649    | 172.4913667 | 103.02792   | 0.199600629  | 0.178133214  | 0.06367502  | 1.172053706 | 1.231276738 | 0.59723198   |
| 3183604 | ZNF462   | 1019.830867 | 753.8251667 | 1036.2505   | 301.1868333 | 180.6598667  | 0.007281651  | 0.050815966 | 0.739166847 | 1.016100349 | 0.598826575  |
| 2814756 | MAP1B    | 1009.698667 | 938.6587    | 841.3381    | 379.9445    | 0.1783389    | 0.1783389    | 0.03088176  | 0.929642408 | 0.833254641 | 0.601454774  |
| 3007960 | CLDN4    | 44.45646667 | 43.47786667 | 196.184     | 228.5194333 | 0.293266915  | 0.869744702  | 0.002194282 | 1.015385388 | 0.601991158 | 0.601991158  |
| 2447877 | FAM129A  | 1367.741333 | 1380.904333 | 3003.351667 | 181.010333  | 0.756013892  | 0.869744702  | 0.002194282 | 0.929642408 | 1.015385388 | 0.601991158  |
| 3016148 | SERPINE1 | 1839.045333 | 2400.769667 | 450.8320667 | 160.5138667 | 0.911321806  | 0.557711678  | 0.006648865 | 0.952922629 | 0.602768616 | 0.602768616  |
| 4026798 | SIC6A16  | 283.2408667 | 320.3545333 | 237.4044    | 271.7749333 | 0.023256037  | 0.468472656  | 0.001248167 | 1.30544344  | 1.041540212 | 0.602829642  |
| 3867734 | SLC6A16  | 176.2407333 | 40.81584    | 439.8714    | 338.3448667 | 0.177660568  | 0.131928257  | 0.001915413 | 0.838171422 | 0.603334872 | 0.603334872  |
| 3813840 | ZNF516   | 41.02171333 | 213.17      | 1094.693    | 249.1120333 | 0.208404304  | 0.133682641  | 0.03584745  | 1.224330133 | 1.224330133 | 0.604063771  |
| 3869783 | KLK7     | 18.86197333 | 19.8654333  | 422.6032333 | 256.1892667 | 0.768211566  | 0.03911609   | 0.01577575  | 1.209477007 | 1.236117048 | 0.605097005  |
| 3109687 | GRHL2    | 18.86197333 | 19.8654333  | 422.6032333 | 256.1892667 | 0.768211566  | 0.03911609   | 0.01577575  | 1.209477007 | 1.236117048 | 0.605097005  |
| 3824372 | COL6A1   | 690.8093    | 870.573667  | 1271.960333 | 771.6016333 | 0.396287358  | 0.028989664  | 0.001694866 | 0.977284328 | 1.063352175 | 0.606614437  |
| 3307218 | PDLM1    | 151.7875    | 124.7654667 | 607.877667  | 1554.328667 | 0.104667211  | 0.2698950474 | 0.002469362 | 0.821974581 | 1.034880782 | 0.606819378  |
| 3058759 | SEMA3C   | 972.2864    | 748.0245667 | 344.7253333 | 210.122     | 0.0359903137 | 0.001851928  | 0.022476241 | 0.769345912 | 0.698466944 | 0.609534547  |
| 3464680 | DUSP6    | 157.0819667 | 1282.694333 | 2904.344    | 1770.841667 | 0.023581522  | 0.638641325  | 0.003682453 | 0.885744634 | 0.968800903 | 0.609721736  |
| 2458513 | TYMD63A  | 448.5562    | 425.4922    | 541.6823    | 331.9716333 | 0.589590079  | 0.031302527  | 0.008881475 | 0.754110559 | 0.61285302  | 0.61285302   |
| 3393479 | FXYD6    | 80.02404    | 88.9363667  | 101.13172   | 82.22342    | 0.291161571  | 0.132831428  | 0.09063307  | 1.111370242 | 1.263766738 | 0.612881606  |
| 2761829 | FGFBP1   | 58.13281333 | 62.14946    | 56.24729    | 1633.057667 | 0.650962511  | 0.785287655  | 0.05261104  | 0.69094311  | 0.967565249 | 0.613309348  |
| 3446820 | RERG     | 238.4764    | 273.1510667 | 99.6787533  | 1001.569533 | 0.134647879  | 0.47300611   | 0.09497946  | 1.08122397  | 1.08122397  | 0.614945489  |
| 3299585 | LIPA     | 758.0763333 | 883.4930667 | 780.1281    | 1099.105    | 0.10279477   | 0.791467435  | 0.009316139 | 1.145400831 | 1.029089111 | 0.61554025   |
| 2396750 | FBXO2    | 726.2552    | 557.5349333 | 664.9126    | 887.9831667 | 0.006573087  | 0.113064042  | 0.005451544 | 0.915535751 | 0.915535751 | 0.618392919  |
| 2344393 | PRKACB   | 313.4756    | 305.7751333 | 299.2989    | 2049.398333 | 0.881800212  | 0.75748558   | 0.002642914 | 0.975435196 | 0.954775747 | 0.618808122  |
| 2500722 | ZC3H6    | 174.0549    | 149.550333  | 123.1902667 | 1268.184333 | 0.315347705  | 0.27898839   | 0.00713346  | 0.820566001 | 0.820566001 | 0.620284855  |
| 3737338 | RNF213   | 975.814     | 1109.300667 | 881.9049    | 548.6998    | 0.161519196  | 0.768015239  | 0.08497437  | 0.976823623 | 0.622175702 | 0.622175702  |
| 3020302 | CAV1     | 1488.763667 | 1299.888667 | 2274.55     | 1416.363333 | 0.076597194  | 0.141878784  | 0.009139841 | 0.870152591 | 0.870152591 | 0.622700461  |
| 3209384 | TMEM2    | 326.0318333 | 260.3850667 | 380.016667  | 2371.699333 | 0.049116127  | 0.956395932  | 0.002158896 | 0.798648212 | 0.99075806  | 0.622794471  |
| 3154317 | NDRG1    | 9943347667  | 81.94262667 | 105.2516    | 2510.815333 | 0.167288372  | 0.325847156  | 1.07531E-05 | 0.824094857 | 1.056514733 | 0.624370631  |
| 3887452 | YPFL3    | 381.1607333 | 443.9220333 | 417.0323333 | 260.5167667 | 0.008829532  | 0.009641988  | 0.030114666 | 1.168393925 | 1.164658357 | 0.624680964  |
| 2956325 | DST      | 892.1506333 | 986.5463    | 1014.194533 | 634.9184    | 0.507056647  | 0.259861547  | 0.006017698 | 0.839427004 | 0.839427004 | 0.62603198   |



|         |          |             |              |             |             |             |             |             |             |             |             |             |
|---------|----------|-------------|--------------|-------------|-------------|-------------|-------------|-------------|-------------|-------------|-------------|-------------|
| 2935536 | TULPA    | 744.3565333 | 608.0663667  | 664.2783667 | 433.5161667 | 272.0884333 | 0.06943518  | 0.172104681 | 0.00833435  | 0.81628904  | 0.892419609 | 0.627631572 |
| 3992408 | FHL1     | 1501.140333 | 1034.043     | 1047.340567 | 385.7266    | 242.4015333 | 0.000348309 | 0.0324481   | 0.02522944  | 0.68983833  | 0.69769664  | 0.629428357 |
| 3851639 | MEM159   | 182.6250667 | 174.9059667  | 168.6041    | 754.434333  | 475.3314333 | 0.607374719 | 0.276419627 | 0.0013877   | 0.957732527 | 0.923225399 | 0.630050025 |
| 3310041 | FGFR2    | 19.66573667 | 22.27135     | 28.48275    | 564.2171667 | 355.8719    | 0.441648175 | 0.432189709 | 0.007011723 | 1.132495079 | 1.448343913 | 0.630735683 |
| 3335571 | OVOL1    | 65.22818667 | 63.89811333  | 52.13932    | 313.4324333 | 197.7334667 | 0.848601323 | 0.136646195 | 0.009335667 | 0.979608918 | 0.79933726  | 0.630864728 |
| 3454006 | FMNL3    | 1422.796    | 1494.854667  | 1458.715667 | 153.3708333 | 96.82854667 | 0.128753764 | 0.369261132 | 0.02824443  | 1.050645818 | 1.025245831 | 0.631336119 |
| 2340529 | PDE4B    | 102.9630667 | 79.5378667   | 75.3716667  | 139.6655333 | 88.21487667 | 0.043064942 | 0.075978828 | 0.001821141 | 0.772338344 | 0.731883935 | 0.631615221 |
| 3721452 | FKBP10   | 2132.278    | 2082.178333  | 2093.353667 | 848.0743    | 535.7123    | 0.589714854 | 0.672268628 | 0.002842169 | 0.976504158 | 0.981745188 | 0.631680656 |
| 2514969 | GAD1     | 174.7881667 | 204.2986333  | 155.6684    | 92.01000667 | 58.13177    | 0.428206135 | 0.12995293  | 0.007731142 | 1.16883561  | 0.890611779 | 0.631798346 |
| 3199207 | NFB      | 836.5979    | 908.5127667  | 829.2805333 | 560.2346667 | 354.255     | 0.204195163 | 0.904889733 | 0.004669753 | 1.085961089 | 0.991253425 | 0.632333237 |
| 3873744 | TGM3     | 92.92603667 | 86.80433333  | 108.7253133 | 150.6386667 | 95.36927333 | 0.316113478 | 0.39462273  | 0.00684621  | 0.934122841 | 1.170019913 | 0.633099559 |
| 2696309 | AMOTL2   | 2091.432    | 2272.542333  | 2209.392    | 945.2756667 | 598.8977    | 0.058818311 | 0.455615306 | 0.001161083 | 1.086596329 | 1.056401547 | 0.633569361 |
| 3666779 | NFAT5    | 1155.762    | 935.3686667  | 1023.631333 | 1619.656667 | 1026.588467 | 0.025861506 | 0.256074251 | 0.00329656  | 0.809309068 | 0.885676578 | 0.633815045 |
| 3643752 | BAIP3    | 74.9850667  | 70.34455     | 61.34159667 | 389.7251333 | 247.6726    | 0.639157438 | 0.129192111 | 0.000734688 | 0.938722035 | 0.818580948 | 0.635050545 |
| 2622859 | HEMK1    | 318.5434    | 270.9517     | 312.0843333 | 408.1631667 | 280.2306333 | 0.154113865 | 0.831816147 | 0.007616043 | 0.850595869 | 0.979723119 | 0.636006988 |
| 2894588 | CREB5    | 236.3628667 | 271.5699     | 207.7638667 | 190.6590333 | 121.2876    | 0.146101133 | 0.321851279 | 0.003262527 | 1.168422645 | 0.879003837 | 0.636159254 |
| 2964139 | GABRR2   | 101.1675833 | 92.73548333  | 103.19616   | 105.11036   | 67.21047    | 0.593905766 | 0.881610146 | 0.009025019 | 0.860521855 | 1.096716007 | 0.637027786 |
| 3421985 | KCNMB4   | 297.1603333 | 256.9541     | 310.0123    | 200.2721    | 128.0634333 | 0.100631138 | 0.721075872 | 0.008335575 | 0.864698519 | 1.043249267 | 0.638447199 |
| 2960955 | SLC17A5  | 1163.724333 | 927.1718667  | 1000.642833 | 721.9388333 | 462.5419667 | 0.080301383 | 0.068723952 | 0.002271705 | 0.976729598 | 0.85986243  | 0.640695897 |
| 3871644 | NLRP9    | 75.46751333 | 65.33446     | 81.29268    | 105.272333  | 67.45454    | 0.486572467 | 0.681096082 | 0.004827581 | 0.865729588 | 1.077187738 | 0.640732453 |
| 3695107 | TK2      | 433.7314667 | 445.6611333  | 506.0210333 | 386.6054667 | 247.877     | 0.131775802 | 0.131775802 | 0.003716173 | 1.02750473  | 1.166668947 | 0.641162687 |
| 2599153 | TNS1     | 36.72804    | 39.41501333  | 38.53756333 | 182.3158    | 116.9621667 | 0.578511989 | 0.71490127  | 0.004412385 | 1.073158637 | 1.04926817  | 0.641536097 |
| 2779756 | G3BP2    | 2547.948333 | 2219.1719667 | 2521.948    | 2489.509333 | 1597.789333 | 0.166521938 | 0.865360026 | 4.38058E-05 | 0.87117923  | 0.989795581 | 0.641808935 |
| 3731543 | RGS9     | 152.2125333 | 155.8548     | 173.1649    | 262.4443333 | 168.4483333 | 0.794631934 | 0.242940759 | 0.001050675 | 1.023928822 | 1.137652046 | 0.641851141 |
| 3113280 | DEPDC6   | 145.2064667 | 134.6274     | 127.4744967 | 375.9212333 | 241.7811    | 0.521641458 | 0.441753341 | 0.003197733 | 0.927144659 | 0.87784433  | 0.643169575 |
| 4017501 | TEX13B   | 88.58748667 | 92.26036333  | 113.7728333 | 144.2155667 | 92.8524333  | 0.74705887  | 0.007623846 | 0.079374215 | 1.041460446 | 1.284299144 | 0.643843418 |
| 3525234 | IRS2     | 19.46714    | 25.8756667   | 22.87979667 | 331.910667  | 332.0262812 | 0.332062812 | 0.692428031 | 0.002541877 | 1.329197133 | 1.175303443 | 0.644040025 |
| 3900091 | C20orf74 | 362.5997667 | 376.3052     | 385.6566    | 526.3486333 | 339.2293    | 0.629880534 | 0.595032296 | 0.002232795 | 1.063887281 | 1.063887281 | 0.644449545 |
| 3933039 | TMPRSS2  | 100.8818633 | 88.46469333  | 105.8638067 | 138.986333  | 89.64159    | 0.212097787 | 0.812164487 | 0.002549796 | 0.876913752 | 1.049389395 | 0.644993391 |
| 3293813 | SARDH    | 84.12347667 | 82.14235333  | 86.91551333 | 230.009333  | 146.5592    | 0.847777011 | 0.837766248 | 0.002226385 | 0.976444896 | 1.033189744 | 0.645892303 |
| 3862445 | XYLTI    | 70.80701333 | 76.89216     | 61.74448    | 233.3519    | 150.8672    | 0.537064851 | 0.343665028 | 0.005993627 | 1.060560731 | 0.87572111  | 0.646109389 |
| 3853588 | CYP4F11  | 13.07013667 | 18.27635667  | 12.262742   | 444.6638667 | 287.5616333 | 0.152170109 | 0.880094317 | 0.001022256 | 1.386329423 | 0.936228997 | 0.646680766 |
| 3497586 | MBNL2    | 248.6250667 | 206.7652667  | 255.8882    | 2525.165333 | 1633.068333 | 0.145785348 | 0.173967087 | 0.000350944 | 0.831634836 | 1.029213198 | 0.64671739  |

ENS100000329805

|            |         |             |             |             |              |              |             |              |              |             |             |             |
|------------|---------|-------------|-------------|-------------|--------------|--------------|-------------|--------------|--------------|-------------|-------------|-------------|
| 3367231    | BDNF    | 545.1696333 | 478.832867  | 568.1126    | 1064.8432    | 688.7526     | 0.14477107  | 0.361106655  | 0.002444307  | 0.878319286 | 1.042083514 | 0.646811286 |
| 3866957    | KLK15   | 83.68655667 | 76.19122867 | 62.76618    | 63.28238333  | 534.21950333 | 105.1930333 | 1064.8432    | 105.1930333  | 0.910433675 | 1.123493989 | 0.647030516 |
| 3152558    | FAM84B  | 78.59666667 | 62.76618    | 63.28238333 | 534.21950333 | 1064.8432    | 105.1930333 | 1064.8432    | 105.1930333  | 0.798555295 | 0.805122795 | 0.647234007 |
| 3334684    | TMTSF2  | 2052.933667 | 1897.131    | 214.0722667 | 157.1743     | 101.9500867  | 0.715606847 | 0.2522032934 | 0.06075051   | 0.924107306 | 1.041074716 | 0.64847578  |
| 2898808    | PRSS16  | 172.5378    | 181.4120667 | 568.9226667 | 157.1743     | 101.9500867  | 0.715606847 | 0.2522032934 | 0.06075051   | 1.051433753 | 1.240726766 | 0.648643491 |
| 3674349    | ZNF276  | 616.2876    | 595.2018333 | 106.76837   | 110.98226    | 286.7862667  | 962.2968    | 0.083068486  | 0.03595596   | 0.967355483 | 0.924645104 | 0.649983387 |
| 3868828    | KLK10   | 116.9912667 | 183.9233    | 211.3434667 | 287.4252667  | 187.4609333  | 0.143374398 | 0.258968486  | 0.01560614   | 0.912618292 | 0.948640041 | 0.650710843 |
| 2438016    | PADR6   | 172.8138667 | 183.9233    | 211.3434667 | 287.4252667  | 187.4609333  | 0.143374398 | 0.258968486  | 0.01560614   | 1.064285543 | 1.222954331 | 0.652207565 |
| 3875642    | PLCB1   | 340.5965333 | 306.4325    | 251.2644333 | 341.7274333  | 222.8805333  | 0.316228135 | 0.091311089  | 0.003457534  | 0.899693538 | 0.737777425 | 0.652217269 |
| 2789056667 | DOC2A   | 278.9056667 | 111.3274533 | 106.9157533 | 325.0602333  | 669.9795     | 437.587667  | 0.007715386  | 0.004162226  | 1.14327413  | 1.165484507 | 0.653092769 |
| 3887363    | MXK     | 121.9048667 | 111.3274533 | 106.9157533 | 325.0602333  | 669.9795     | 437.587667  | 0.007715386  | 0.004162226  | 0.913232231 | 0.877042535 | 0.653673587 |
| 3250373    | TSPAN15 | 3250373     | 329.7331    | 329.7331    | 165.5554333  | 384.3769333  | 277.3715    | 0.136285256  | 0.04088957   | 1.103934897 | 1.241145553 | 0.653905811 |
| 3315607    | ATHL1   | 209.4988667 | 144.3392667 | 977.775667  | 1166.472667  | 763.1616333  | 0.570302036 | 0.002377924  | 0.00584531   | 0.689373974 | 0.742512052 | 0.654026131 |
| 2870047    | LAMB2   | 1183.607667 | 1234.54     | 300.2594333 | 315.7144667  | 206.7216333  | 0.770494726 | 0.234974431  | 0.007661424  | 1.043031432 | 0.826099386 | 0.654247305 |
| 2867809    | OSBP110 | 375.3745    | 359.5582667 | 111.3274533 | 315.7144667  | 206.7216333  | 0.770494726 | 0.234974431  | 0.007661424  | 0.957865456 | 0.879813182 | 0.654778177 |
| 3457752    | STAT2   | 591.7152667 | 679.1753333 | 721.917667  | 631.9851333  | 414.7206     | 0.052134851 | 0.245034483  | 0.006023786  | 1.148762821 | 1.220032349 | 0.656219234 |
| 3866491    | MEIS3   | 98.98616667 | 109.6595933 | 114.2806167 | 299.2170333  | 196.4082667  | 0.347839307 | 0.524031387  | 0.005867169  | 1.107617355 | 1.017696691 | 0.656407373 |
| 3866753    | KLK5    | 180.2388667 | 164.2302667 | 183.4286    | 206.9665333  | 135.86814    | 0.45645773  | 0.250031387  | 0.00382703   | 0.988371244 | 0.946574784 | 0.656653903 |
| 3445908    | EPF8    | 1103.867    | 1091.0304   | 644.987667  | 1545.197667  | 1016.1299333 | 0.872065315 | 0.306141331  | 0.001979462  | 0.799346936 | 1.050501962 | 0.657604755 |
| 3127818    | LOXL2   | 806.8934    | 644.987667  | 847.8431    | 793.4930333  | 522.0387333  | 0.17252475  | 0.470024588  | 0.004688632  | 0.836891526 | 0.918300669 | 0.658566185 |
| 2463482    | OPN3    | 83.85374667 | 70.17649    | 77.00295333 | 233.2328     | 153.6039     | 0.297377402 | 0.328875955  | 0.001441259  | 0.938417629 | 0.89209765  | 0.658633415 |
| 2955989    | GPR110  | 64.0769667  | 53.71884    | 57.15821    | 751.4333     | 494.9641667  | 0.077101632 | 0.178444221  | 0.030371692  | 0.977102158 | 0.849804076 | 0.658850347 |
| 3487095    | DGKH    | 214.0027    | 209.1025    | 181.8603667 | 149.0832333  | 98.22354     | 0.795169443 | 0.178444221  | 0.002611395  | 1.173417568 | 1.108243477 | 0.659216388 |
| 3288803    | OGDHL   | 57.61800667 | 67.61092    | 63.85566667 | 277.3759     | 182.8507333  | 0.312891315 | 0.52126454   | 0.008761169  | 0.914420951 | 1.002139682 | 0.660126138 |
| 2955673    | ENPP5   | 27.99949333 | 25.60332333 | 28.05940333 | 177.1178667  | 116.9201333  | 0.47138766  | 0.983888194  | 0.00686097   | 0.108996856 | 1.00047907  | 0.660140654 |
| 3665029    | CEP3    | 113.6693333 | 114.692     | 113.7202467 | 295.5630333  | 195.1132333  | 0.345513732 | 0.997444836  | 0.001036855  | 1.074013877 | 1.034961329 | 0.660294433 |
| 3150844    | SNTB1   | 329.6165667 | 354.0127667 | 341.1404    | 152.7512333  | 100.8607733  | 0.894175497 | 0.735230339  | 0.0106768794 | 1.019518867 | 1.03539466  | 0.660796944 |
| 3304012    | MGEA5   | 801.83      | 919.4327    | 833.7496667 | 879.2557667  | 581.0121667  | 0.894175497 | 0.735230339  | 0.0106768794 | 1.117374584 | 1.110231214 | 0.661193774 |
| 2501238    | PSD4    | 43.50467667 | 48.61102    | 48.30025    | 170.2019     | 112.5364367  | 0.1849079   | 0.630563875  | 0.008566939  | 0.934391531 | 1.02342107  | 0.661292041 |
| 3144780    | RBM12B  | 1220.020333 | 1139.976667 | 1248.597    | 1366.934333  | 903.9421333  | 0.1849079   | 0.630563875  | 0.008566939  | 0.934391531 | 1.02342107  | 0.661292041 |
| 3104013    | ZFX4    | 625.7519667 | 585.8076    | 604.3783    | 352.8004667  | 233.5423     | 0.615397485 | 0.736864932  | 0.006187713  | 0.936165815 | 0.965843229 | 0.661967065 |
| 2500815    | ---     | 801.3549    | 643.9733    | 648.026     | 505.1058     | 334.3676667  | 0.154906752 | 0.067845363  | 0.02323694   | 0.803603616 | 0.808662928 | 0.661979504 |
| 3757840    | STAT3   | 1489.914333 | 1296.358    | 1271.899667 | 2036.22      | 1350.07667   | 0.115305136 | 0.029707259  | 0.001817124  | 0.870088951 | 0.853673019 | 0.663031336 |
| 2440117    | PEX19   | 650.2255333 | 444.4230667 | 570.0010333 | 378.0912333  | 250.7264     | 0.022211967 | 0.148837381  | 0.005756597  | 0.683490641 | 0.876620502 | 0.663137301 |

|         |          |                  |             |             |             |             |             |              |              |             |              |             |             |
|---------|----------|------------------|-------------|-------------|-------------|-------------|-------------|--------------|--------------|-------------|--------------|-------------|-------------|
| 2864449 | SERINC5  | NM_178276        | 341.8562333 | 319.8505333 | 322.4401    | 1326.857333 | 880.1598667 | 0.4927703405 | 0.425761363  | 0.002732035 | 0.935098454  | 0.943258989 | 0.663341751 |
| 3360014 | USH1C    | NM_153676        | 63.46517667 | 77.33398    | 74.60733667 | 471.3221667 | 312.6794    | 0.126218518  | 0.404498134  | 0.003958107 | 1.218749739  | 1.175748624 | 0.663409069 |
| 3734966 | MYO1B    | NM_003867        | 115.3405333 | 98.74603    | 123.0650333 | 202.4068333 | 134.4037    | 0.407420537  | 0.20575297   | 0.026093688 | 0.866128005  | 1.066971253 | 0.664027483 |
| 3514879 | THSD1    | NM_018676        | 168.8952    | 132.2309333 | 111.02782   | 79.37686667 | 57.11311667 | 0.040007609  | 0.006175731  | 0.171911658 | 0.665254723  | 0.719520039 | 0.790432001 |
| 3008938 | KIAA1505 | NM_020879        | 139.7675667 | 121.7366367 | 94.31124    | 254.7833333 | 201.3889    | 0.399901393  | 0.064165989  | 0.08205405  | 0.870993461  | 0.674771996 | 0.79432001  |
| 2400518 | ECE1     | NM_001397        | 1441.992333 | 1222.977333 | 965.71324   | 855.1754333 | 832.2494667 | 0.031894647  | 0.006520344  | 0.810227699 | 0.848116391  | 0.669720898 | 0.873191505 |
| 2951567 | FKBP5    | NM_004117        | 477.2862667 | 398.2639    | 263.2319333 | 337.9330333 | 341.1451333 | 0.308138527  | 0.00275176   | 0.869256173 | 0.834434024  | 0.551517929 | 1.009505138 |
| 2640579 | PLXNA1   | NM_032242        | 1144.208667 | 892.6655667 | 771.1807333 | 372.7291    | 387.3881667 | 0.006952919  | 0.00275176   | 0.525818831 | 0.780159767  | 0.673986097 | 1.03932901  |
| 2877508 | HSPA9    | NM_004134        | 2481.435667 | 2508.291667 | 1673.680667 | 1491.620333 | 1709.221    | 0.909021771  | 0.007593176  | 0.010377732 | 0.674480781  | 0.674480781 | 1.45882073  |
| 3824874 | IF30     | NM_006332        | 722.4956    | 583.4375333 | 485.0323667 | 1647.391667 | 1955.270333 | 0.025081427  | 0.00726321   | 0.08628669  | 0.807530916  | 0.671329163 | 1.186895771 |
| 3740988 | TSR1     | NM_018128        | 633.5822    | 558.2234    | 425.435     | 401.4371333 | 540.7576333 | 0.345356377  | 0.058919436  | 0.09112003  | 0.881059159  | 0.671475619 | 1.347054342 |
| 3329886 | PTPMT1   | NM_175732        | 393.1316333 | 420.715     | 411.8080333 | 277.6970333 | 418.11757   | 0.008804308  | 0.730450714  | 0.007309684 | 1.070163183  | 1.047506734 | 1.508870246 |
| 3950872 | NCAPH2   | NM_152299        | 380.8947    | 395.104333  | 380.5783667 | 389.3757    | 587.5232333 | 0.349635764  | 0.984233392  | 0.03116102  | 0.999169499  | 0.999169499 | 1.508885206 |
| 2332144 | CTPS     | NM_001905        | 1209.571667 | 1166.517233 | 956.1332333 | 578.0626    | 872.9217    | 0.678249815  | 0.049218454  | 0.05713444  | 0.984405273  | 0.790472578 | 1.510081607 |
| 3862280 | NDUFA6   | NM_020490        | 1105.914    | 1189.638    | 1205.681333 | 682.1001    | 1030.205    | 0.199434858  | 0.333166846  | 0.07531701  | 1.075886552  | 1.09021256  | 1.510342837 |
| 3871576 | FIZ1     | NM_032636        | 154.4547667 | 166.5662333 | 161.5022333 | 151.6793667 | 142.5063667 | 0.493102195  | 0.071522158  | 0.082626154 | 1.078556764  | 1.04862803  | 1.511286651 |
| 3796832 | BAD      | NM_004322        | 336.2186667 | 321.7975    | 350.0317667 | 223.8799333 | 229.2881667 | 0.272542372  | 0.26563091   | 0.002940538 | 0.956998805  | 1.142501421 | 1.512923147 |
| 3549220 | ---      | ENST00000013070  | 740.9343667 | 825.8232867 | 484.5165667 | 151.6793667 | 338.7131333 | 0.250502486  | 0.362126324  | 0.08221812  | 1.142501421  | 1.142501421 | 1.512923147 |
| 3472468 | RBM19    | NM_016196        | 473.0012333 | 506.4876333 | 481.4263333 | 251.0522667 | 379.8838667 | 0.385774228  | 0.907389912  | 0.004531584 | 1.070795587  | 1.017812004 | 1.513166448 |
| 3354731 | E124     | NM_004879        | 757.8100667 | 832.3495667 | 904.0811333 | 634.1707    | 960.4220333 | 0.161185382  | 0.175819751  | 0.000757917 | 1.038836178  | 1.19301811  | 1.514453495 |
| 3746040 | ELAC2    | NM_018127        | 793.5988333 | 824.4369333 | 805.5030333 | 795.9306667 | 1206.034667 | 0.563010448  | 0.85713632   | 0.007683599 | 1.038836178  | 1.015000274 | 1.51525091  |
| 3408493 | DERA     | NM_015954        | 722.8286667 | 770.756     | 763.2621333 | 206.8948667 | 313.5566    | 0.41605746   | 0.593277574  | 0.07909275  | 1.066305247  | 1.05837829  | 1.51553591  |
| 3337747 | PSMA3    | NM_002788        | 681.2146333 | 693.5161    | 656.7652333 | 457.6986667 | 693.827     | 0.91953216   | 0.841495617  | 0.08235422  | 1.018058136  | 0.964109109 | 1.515909438 |
| 3644220 | NDUFB10  | NM_004548        | 679.6593667 | 651.1565333 | 705.7188667 | 369.917667  | 581.6825667 | 0.58950639   | 0.488392864  | 0.003158632 | 0.968063061  | 1.038342001 | 1.518360811 |
| 3619991 | NDUFAF1  | NM_016013        | 279.4375333 | 309.0727667 | 223.5572333 | 172.3212333 | 282.0981333 | 0.667838639  | 0.294740015  | 0.00043593  | 1.10605316   | 0.80002579  | 1.520985709 |
| 3441215 | ---      | ENST000000281250 | 857.9746333 | 850.6496667 | 803.4439667 | 177.8753333 | 271.4263667 | 0.89930355   | 0.396043469  | 0.01091311  | 0.991461675  | 0.936426265 | 1.525935955 |
| 3754227 | MYOHD1   | NM_025109        | 508.9632667 | 499.6865    | 480.5979    | 543.7254333 | 830.5769    | 0.596601907  | 0.514765248  | 0.003153312 | 0.981715344  | 0.944212687 | 1.527566763 |
| 2853768 | NUP155   | NM_153485        | 1084.959    | 1073.391    | 905.4855    | 418.2439    | 639.0667667 | 0.913083348  | 0.223501903  | 0.00506711  | 0.834580385  | 0.834580385 | 1.5279763   |
| 3157751 | SCRIB    | NM_182706        | 672.6769667 | 746.9814333 | 666.4819    | 561.2626667 | 858.1430333 | 0.06671971   | 0.829258364  | 0.00498222  | 0.990790428  | 0.990790428 | 1.528950309 |
| 3716893 | ATAD5    | NM_024857        | 237.9018    | 293.9615333 | 283.3909    | 118.0927667 | 180.5645667 | 0.159116047  | 0.326898114  | 0.008984693 | 1.235642325  | 1.191209566 | 1.529006151 |
| 3976670 | EBP      | NM_006579        | 479.4687667 | 568.5203333 | 567.2414333 | 554.3817    | 847.8903333 | 0.006694027  | 0.272333773  | 0.010109032 | 1.185860193  | 1.183012977 | 1.529434203 |
| 3852760 | NFKB1B   | NM_001001716     | 932.0920333 | 1006.540333 | 780.3260333 | 396.0134    | 609.0149667 | 0.0109684723 | 0.0109684723 | 0.001717052 | 0.819393697  | 0.819393697 | 1.530136941 |
| 2352743 | DCLRE1B  | NM_022836        | 206.1664333 | 212.6097    | 159.1769    | 113.4653    | 173.6943333 | 0.891823538  | 0.064274985  | 0.003991964 | 0.764586246  | 0.764586246 | 1.530544778 |
| 2438531 | HDFG     | NM_004494        | 1715.615333 | 1814.598    | 1540.236333 | 1051.548333 | 1610.298333 | 0.574999711  | 0.265183016  | 4.96306E-05 | 1.0571642681 | 0.89777487  | 1.531359313 |

|         |          |             |             |              |             |             |             |             |             |             |             |
|---------|----------|-------------|-------------|--------------|-------------|-------------|-------------|-------------|-------------|-------------|-------------|
| 3653072 | PLK1     | 990.8686333 | 1070.697    | 1141.510333  | 1186.924    | 0.0597457   | 0.01570491  | 0.005479633 | 1.080542216 | 1.152006689 | 1.531659988 |
| 3673684 | CDT1     | 667.4799    | 788.4429333 | 826.3491     | 399.4428333 | 611.8329667 | 1817.964    | 0.006295395 | 1.181223485 | 1.238013459 | 1.531715969 |
| 2694123 | RUVBL1   | 1056.012333 | 1010.909333 | 824.8038     | 664.3451    | 1018.096333 | 611.8329667 | 0.006295395 | 0.957328529 | 0.780866591 | 1.532481136 |
| 3624648 | CDC124   | 680.8296667 | 748.1784    | 701.0280667  | 479.5197333 | 734.9949333 | 0.122726215 | 0.003847258 | 1.089921561 | 1.029667332 | 1.532773069 |
| 3722739 | GPC3     | 814.2193333 | 701.4816667 | 753.2505667  | 465.5971667 | 714.6566667 | 0.180545842 | 0.001118399 | 0.861538947 | 0.925119972 | 1.533607322 |
| 3654892 | L1M4     | 1817.808667 | 1863.591333 | 1923.904333  | 1727.062333 | 2649.788    | 0.319740099 | 0.001929904 | 1.025185636 | 1.058364595 | 1.534256908 |
| 3380996 | C11orf51 | 701.0336    | 716.5334    | 800.0316     | 469.1775    | 720.1845667 | 0.736700358 | 0.001624838 | 1.022107281 | 1.14121329  | 1.534993828 |
| 3334125 | COX8A    | 1149.786667 | 1173.184333 | 1144.528     | 808.0796    | 1240.671667 | 0.358745361 | 0.008856874 | 1.020349572 | 0.995426398 | 1.535333483 |
| 3932131 | DSCR2    | 867.3158667 | 946.7090667 | 830.1537667  | 450.6505    | 691.9978333 | 0.772414632 | 0.004587352 | 1.091538969 | 0.95715275  | 1.535553235 |
| 3895075 | IDH3B    | 1145.802    | 1210.38333  | 1197.647667  | 841.2398333 | 1291.919667 | 0.631763322 | 0.004045054 | 1.056324158 | 1.045248365 | 1.535732874 |
| 4015763 | GLA      | 360.3521333 | 409.8715333 | 243.6387667  | 134.8639    | 207.1678667 | 0.035681437 | 0.002682011 | 1.137411942 | 1.167360926 | 1.535991948 |
| 2712906 | RNF168   | 293.4656333 | 329.6625333 | 329.6625333  | 452.9603    | 696.1491667 | 0.343287307 | 0.008439612 | 1.123265575 | 0.830155118 | 1.536125432 |
| 3259168 | KIF11    | 896.7442    | 1034.290667 | 980.7580667  | 398.4032    | 196.674333  | 0.554288303 | 0.001431953 | 1.153383614 | 1.093687661 | 1.536888747 |
| 3377826 | RNASEH2C | 362.6075    | 355.9891667 | 398.4032     | 196.674333  | 302.5742333 | 0.15014705  | 0.002218894 | 0.979817479 | 1.098717484 | 1.538470287 |
| 2545811 | PRMG     | 1662.98     | 1654.096667 | 1679.35      | 989.0716667 | 1521.720667 | 0.882886696 | 0.000271935 | 0.994658164 | 1.009843774 | 1.538533971 |
| 2621451 | DXK30    | 953.7275667 | 1036.206433 | 841.7441     | 781.4095667 | 1202.387667 | 0.364289626 | 0.005242826 | 1.086577596 | 0.862583361 | 1.538741932 |
| 3421177 | NUP107   | 1229.462333 | 1467.637    | 808.1129     | 736.8248    | 1136.925333 | 0.091168896 | 0.000181564 | 1.193722622 | 1.027754138 | 1.538829413 |
| 2398789 | SDHB     | 87.8117     | 945.3004333 | 1104.082667  | 1000.1406   | 1539.860333 | 0.353136096 | 0.004571954 | 1.076882928 | 0.920598372 | 1.539140194 |
| 3819600 | --       | 1098.215    | 1179.545667 | 1088.215     | 1179.545667 | 1000.1406   | 0.22204494  | 0.000523408 | 1.074057144 | 1.005342913 | 1.53943859  |
| 2393538 | WDR8     | 308.0482667 | 324.7784333 | 336.1718     | 292.5528667 | 450.527     | 0.567065446 | 0.000932426 | 1.054310212 | 1.091295866 | 1.539956465 |
| 2673085 | CDC25A   | 317.6105667 | 259.9373333 | 375.8665     | 134.4045667 | 207.1762    | 0.086674943 | 0.002886736 | 0.818415256 | 1.183414688 | 1.541437208 |
| 3590388 | NUSAP1   | 1275.407333 | 1724.646667 | 1607.7704333 | 917.6713333 | 1418.218    | 0.009485969 | 0.000554415 | 1.352232045 | 1.260541861 | 1.545453093 |
| 2713362 | BHD1     | 2774972333  | 29.37768333 | 26.40386     | 259.563     | 401.2963333 | 0.564731251 | 0.006435799 | 1.05866581  | 0.951499937 | 1.546045982 |
| 2620194 | ZNF35    | 176.2469667 | 186.3052333 | 134.46226    | 93.32088333 | 144.3708667 | 0.701636408 | 0.001802657 | 1.057069162 | 0.76291957  | 1.547037078 |
| 3625642 | ZNF738   | 355.7047    | 409.8951333 | 391.9492     | 76.31351667 | 118.0903    | 0.197834625 | 0.080034634 | 1.152346689 | 1.101894915 | 1.54743014  |
| 3893673 | S1C2AARG | 556.2839333 | 478.1715    | 539.2393333  | 323.5123333 | 323.5123333 | 0.053413214 | 0.006151876 | 0.85958172  | 0.969359892 | 1.548201467 |
| 2334404 | NASP     | 587.6601333 | 653.8866667 | 659.7689333  | 398.8379    | 618.0564333 | 0.207555325 | 0.005192798 | 1.112317109 | 1.12266673  | 1.549643008 |
| 3595979 | CENB2    | 736.1095333 | 862.3748667 | 819.7693333  | 403.3331667 | 627.4336333 | 0.354284909 | 0.002159761 | 1.113661617 | 1.113661617 | 1.555621221 |
| 2406225 | --       | 1226.688333 | 1297.964667 | 1099.561067  | 897.8756667 | 1396.864333 | 0.652113719 | 0.002369562 | 0.896366472 | 0.896366472 | 1.555742063 |
| 3882012 | DNMT3B   | 169.1862333 | 233.3820667 | 221.9727     | 400.2091333 | 622.9028667 | 0.042422943 | 0.008405942 | 1.379416445 | 1.311924596 | 1.558447545 |
| 3709861 | WDR79    | 741.4261    | 730.3835667 | 683.2662     | 553.8515333 | 863.9405333 | 0.698914525 | 0.004739489 | 0.965376111 | 0.921556713 | 1.558877479 |
| 3393397 | CENPJ    | 156.3574667 | 161.9903667 | 165.9424667  | 215.6941333 | 336.7175    | 0.367081221 | 0.001609252 | 1.163296246 | 1.061307837 | 1.561087892 |
| 3493391 | C13orf54 | 178.5604333 | 192.7144667 | 173.1104667  | 188.4194333 | 294.1975667 | 0.84461169  | 0.009471509 | 1.079267467 | 0.969478307 | 1.561405439 |
| 2594131 | ACAT2    | 447.7878333 | 486.5796667 | 430.1948     | 183.4867    | 286.7372    | 0.588955821 | 0.001221552 | 1.086616541 | 0.96071123  | 1.56271381  |

|         |          |                  |             |             |             |             |             |             |             |             |             |             |              |
|---------|----------|------------------|-------------|-------------|-------------|-------------|-------------|-------------|-------------|-------------|-------------|-------------|--------------|
| 3629243 | RBPM52   | NM_194272        | 430.9659333 | 458.0486333 | 286.6729333 | 200.8873    | 313.9593    | 0.41147029  | 0.007467594 | 0.042127235 | 1.062841858 | 0.665186993 | 1.562862659  |
| 378583  | CKS2     | NM_001827        | 525.1157    | 571.9393    | 559.2053    | 413.82667   | 647.5478    | 0.17871045  | 0.305139079 | 0.002286057 | 1.089168159 | 1.064916285 | 1.56477938   |
| 257687  | SMPD4    | NM_017951        | 911.9325667 | 967.2663667 | 897.3053    | 525.9276667 | 823.1041667 | 0.377628195 | 0.79505725  | 0.002370756 | 1.060677513 | 0.983956855 | 1.565052038  |
| 2954324 | MEA1     | NM_014623        | 1095.659333 | 1099.763033 | 1170.020667 | 376.7349333 | 593.6432    | 0.961619679 | 0.34924208  | 0.00024269  | 1.003736289 | 1.067869027 | 1.565134529  |
| 2950798 | --       | EN_S100000374231 | 872.8621667 | 930.3861667 | 881.012667  | 396.6198333 | 621.1894333 | 0.417413718 | 0.924718472 | 0.009551762 | 1.065878308 | 1.009318096 | 1.566208699  |
| 3355114 | DCFS     | NM_014026        | 561.9481667 | 586.1139    | 583.1275667 | 261.9953667 | 410.07049   | 0.332237616 | 0.702952979 | 0.001591279 | 1.043003492 | 1.037689241 | 1.567603676  |
| 3458133 | PRIM1    | NM_000946        | 1572.711333 | 1721.368    | 1628.579333 | 762.2138    | 1195.485667 | 0.206994768 | 0.456450048 | 0.006136808 | 1.094522538 | 1.035523366 | 1.568438759  |
| 3374856 | MRPL16   | NM_017840        | 585.4473333 | 709.6607333 | 666.5314667 | 448.0251333 | 703.1593333 | 0.04667382  | 0.40637459  | 0.000848386 | 1.212168359 | 1.138498449 | 1.569464035  |
| 3471224 | ATPBD1C  | NM_016301        | 543.9629333 | 536.657333  | 473.3247333 | 342.5522    | 537.8088667 | 0.898474509 | 0.338697337 | 0.001856855 | 0.986569673 | 0.870141519 | 1.570005584  |
| 3017206 | PSMC2    | NM_002803        | 508.5304667 | 546.8471333 | 505.0115667 | 305.4678333 | 479.6163    | 0.544175099 | 0.954357595 | 0.002583653 | 1.075347829 | 0.993080257 | 1.570104108  |
| 3828112 | CCNE1    | NM_001238        | 278.8325    | 307.4847667 | 375.5272    | 400.4470333 | 629.3590333 | 0.073926996 | 0.056583056 | 0.020242582 | 1.102757988 | 1.34678418  | 1.571648993  |
| 3719210 | MGC4172  | NM_024308        | 240.7663667 | 246.8702333 | 233.3871    | 140.7721    | 221.3582    | 0.713629481 | 0.40070581  | 0.002799838 | 1.025351824 | 0.969350924 | 1.572457895  |
| 3743611 | GPS2     | NM_004489        | 217.7238667 | 250.0136333 | 197.2315    | 222.872667  | 351.5360667 | 0.173512703 | 0.518670572 | 0.004551037 | 1.148306005 | 0.905879098 | 1.57729131   |
| 3789480 | GPS1     | NM_212492        | 1425.231667 | 1498.604333 | 1622.709333 | 1219.246667 | 1825.823333 | 0.169146369 | 0.65207272  | 0.001902663 | 1.051481221 | 1.138559293 | 1.579519047  |
| 4010880 | LAS1L    | NM_031206        | 1423.785667 | 1463.125333 | 1460.785667 | 584.0431    | 923.0927667 | 0.28456512  | 0.657671923 | 0.003133979 | 1.027823112 | 1.025979852 | 1.586521654  |
| 3079463 | ABCF2    | NM_007189        | 1407.130667 | 1255.652667 | 1231.991    | 932.2851667 | 1473.609    | 0.039164167 | 0.037530929 | 0.000461335 | 0.892348727 | 0.875534164 | 1.586638617  |
| 4013434 | TAF9B    | NM_015975        | 554.2979667 | 577.432     | 636.2128667 | 133.4470333 | 211.1357    | 0.56856709  | 0.006918287 | 0.077721266 | 1.041735736 | 1.147781347 | 1.582280168  |
| 3439195 | PGAM5    | NM_138575        | 861.662     | 881.7824667 | 866.5058667 | 641.034867  | 1014.281733 | 0.396086674 | 0.950972692 | 0.005287319 | 1.023350765 | 0.99401606  | 1.582280168  |
| 3470281 | --       | --               | 440.3169333 | 473.9657333 | 432.2063333 | 321.5001333 | 508.9982    | 0.592895275 | 0.780705346 | 0.002936988 | 1.07641195  | 0.981580086 | 1.583197477  |
| 2987410 | NUDT1    | NM_198949        | 239.7449667 | 277.5793667 | 269.4555333 | 70.57993667 | 111.7582    | 0.067507597 | 0.332092084 | 0.008535529 | 1.157811029 | 1.123925716 | 1.583427321  |
| 3375340 | FLJ12529 | NM_024811        | 839.2098333 | 862.1199667 | 828.8491    | 540.2103    | 856.1189    | 0.685535098 | 0.896330309 | 0.005077465 | 1.027299648 | 0.98765418  | 1.584788183  |
| 3655877 | CDC95    | NM_173618        | 586.4657333 | 612.5301667 | 583.8060333 | 332.8738    | 528.0485333 | 0.532510652 | 0.965890553 | 0.009536025 | 1.044443233 | 0.995464867 | 1.586332518  |
| 2438344 | GPATCH4  | NM_182679        | 425.2346667 | 356.0319667 | 296.2049667 | 253.9214    | 402.9326667 | 0.148237861 | 0.009775606 | 0.011145597 | 0.837259976 | 0.673051821 | 1.5868840127 |
| 3293537 | PCBD1    | NM_000281        | 978.2249    | 984.5171333 | 999.1393333 | 822.652333  | 1305.820667 | 0.917980362 | 0.78437442  | 0.001498895 | 1.006432297 | 1.021379985 | 1.58732443   |
| 3329649 | DBE2     | NM_000107        | 475.7559333 | 417.8663333 | 415.5017333 | 581.0539    | 922.5158333 | 0.02837768  | 0.16004772  | 0.006834009 | 0.878320803 | 0.873354811 | 1.587659653  |
| 3707199 | PSMB6    | NM_002798        | 720.5145333 | 648.3792333 | 516.1173    | 537.9623333 | 855.3725    | 0.190354373 | 0.01281016  | 0.005255269 | 0.899883629 | 0.716317681 | 1.587659653  |
| 3819592 | --       | --               | 803.4086    | 838.6826333 | 783.6331667 | 674.4765333 | 1073.427333 | 0.532437129 | 0.785629801 | 0.00660961  | 1.043905471 | 0.975385654 | 1.591496632  |
| 3770721 | SIC25A19 | NM_021734        | 332.2222    | 310.4651333 | 327.723     | 291.9166    | 464.8218667 | 0.268880832 | 0.017032824 | 0.001355256 | 0.934510497 | 0.775754901 | 1.592310498  |
| 3706000 | RP41     | NM_002945        | 1212.891333 | 1306.558667 | 1194.76     | 846.1257333 | 1348.049667 | 0.00626494  | 0.836186104 | 0.002791733 | 1.077226484 | 0.985051148 | 1.593196889  |
| 2449559 | ASPM     | NM_018136        | 423.0478667 | 514.2357    | 426.3819667 | 246.9843    | 393.356     | 0.275152762 | 0.961088555 | 0.004699067 | 1.007881141 | 1.007881141 | 1.593408821  |
| 3884922 | DHX35    | NM_021931        | 725.7370333 | 700.0442    | 653.8945333 | 265.7011667 | 423.4566667 | 0.328006511 | 0.326109542 | 0.001634075 | 0.964597599 | 0.901007532 | 1.593729045  |
| 3719150 | PIGW     | NM_178517        | 234.9305667 | 220.4149333 | 190.4076333 | 117.9475667 | 187.3239333 | 0.458978697 | 0.115074188 | 0.007214689 | 0.938213092 | 0.810484715 | 1.596229638  |
| 3430926 | UNG      | NM_003362        | 622.6991667 | 766.1923    | 699.9540667 | 460.2638    | 735.1605    | 0.145386646 | 0.107493441 | 0.003714534 | 1.23043733  | 1.204594353 | 1.59730246   |
| 2806517 | SKP2     | NM_005983        | 632.9488    | 837.7494333 | 699.9540667 | 692.5197    | 1107.0129   | 0.087930344 | 0.382558701 | 0.00639622  | 1.323568877 | 1.105830782 | 1.59852911   |

|         |           |                 |             |             |             |             |              |             |             |             |             |             |             |
|---------|-----------|-----------------|-------------|-------------|-------------|-------------|--------------|-------------|-------------|-------------|-------------|-------------|-------------|
| 3880827 | GINS1     | BC012542        | 625.0429    | 643.4908    | 626.8823333 | 429.3103333 | 686.6150667  | 0.328607957 | 0.970301478 | 0.003742653 | 1.029514614 | 1.002942891 | 1.598344375 |
| 3427767 | TMPO      | NM_001032283    | 750.2696667 | 647.909     | 647.909     | 262.9833333 | 421.0696667  | 0.335190917 | 0.998998991 | 0.001084733 | 1.139996439 | 0.983887423 | 1.60183224  |
| 3010082 | PHTF2     | NM_020432       | 896.9057667 | 944.7786    | 874.8612    | 264.9523333 | 425.5068667  | 0.663865927 | 0.814997501 | 0.006460556 | 0.975421535 | 0.975421535 | 1.605975163 |
| 3881443 | TPX2      | NM_012112       | 1704.144667 | 1984.789333 | 1778.935    | 951.9541    | 1529.079667  | 0.036745442 | 0.597677882 | 0.002553284 | 1.164683583 | 1.043887315 | 1.606253365 |
| 3837504 | SEPW1     | NM_003009       | 639.6779333 | 606.4119    | 624.7228333 | 904.6351    | 1455.275667  | 0.37699545  | 0.723831588 | 0.005351433 | 0.947995653 | 0.976620891 | 1.608688041 |
| 2838201 | PTTG1     | NM_004219       | 1471.024667 | 1708.909    | 1628.168    | 1084.680667 | 1745.567     | 0.079040227 | 0.300534631 | 0.008586447 | 1.161713354 | 1.106825764 | 1.609291152 |
| 3715874 | ERAL1     | NM_005702       | 519.1601333 | 519.1601333 | 523.5604667 | 497.414     | 801.0773667  | 0.503864592 | 0.609768604 | 0.000712098 | 1.033973991 | 1.04273782  | 1.610484157 |
| 3738471 | RAC3      | NM_005052       | 578.2383667 | 529.7225333 | 539.1595333 | 848.1070667 | 1366.186667  | 0.078308366 | 0.317345489 | 8.32384E-05 | 0.916097174 | 0.932417433 | 1.610865798 |
| 2531712 | PSMD1     | NM_002807       | 1076.022    | 1171.928667 | 901.721     | 708.0071    | 1141.135333  | 0.784078937 | 0.319707105 | 0.004506531 | 1.038946199 | 0.838013535 | 1.611756907 |
| 3037944 | RPA3      | NM_002947       | 361.1421    | 371.4114667 | 388.3759    | 181.9631    | 283.6609667  | 0.828831668 | 0.590082817 | 0.008965046 | 1.028435806 | 1.075410206 | 1.613848998 |
| 2570616 | BUB1      | NM_004336       | 888.0756333 | 1042.243333 | 1010.419833 | 486.0773    | 784.7293333  | 0.309611218 | 0.257715036 | 0.003216164 | 1.173597489 | 1.137763266 | 1.614412632 |
| 2911413 | PRIM2     | NM_000947       | 295.4858    | 389.7078    | 299.4697667 | 204.6577    | 331.4167667  | 0.325838737 | 0.947849026 | 0.005201639 | 1.318871499 | 1.013482769 | 1.619371109 |
| 2374872 | IPO9      | NM_018085       | 895.0922    | 885.0922    | 715.2641333 | 728.4577333 | 1182.179333  | 0.910850927 | 0.226763991 | 0.001122915 | 0.987791426 | 0.798257829 | 1.622852335 |
| 3417146 | CDK2      | NM_001798       | 757.7105    | 845.3746    | 762.4237333 | 634.4603333 | 1029.6369    | 0.178263879 | 0.931944988 | 0.001134194 | 1.115698034 | 1.006220382 | 1.622854447 |
| 3980560 | KIF4A     | NM_012310       | 640.7045333 | 1120.394    | 1188.167667 | 424.5180333 | 990.3896667  | 0.637247443 | 0.050881755 | 1.246770362 | 1.322312575 | 0.976592426 | 1.62506104  |
| 3919689 | ---       | ---             | ---         | ---         | ---         | ---         | ---          | ---         | ---         | ---         | ---         | ---         | ---         |
| 3630089 | TIPIN     | NM_017858       | 487.6797    | 467.9113    | 411.7706667 | 285.7250333 | 465.1151667  | 0.561689481 | 0.106209771 | 0.002344286 | 0.959464639 | 0.844346539 | 1.627841849 |
| 3699768 | ---       | ---             | ---         | ---         | ---         | ---         | ---          | ---         | ---         | ---         | ---         | ---         | ---         |
| 2893169 | CDKN1A    | NM_078467       | 296.8255333 | 314.3586    | 196.2654667 | 945.4579667 | 1540.613333  | 0.468368584 | 0.128637729 | 0.00691915  | 1.061016539 | 0.866020249 | 1.629488975 |
| 3893120 | B4GALT6   | ---             | 345.2392667 | 301.9440667 | 262.8470333 | 145.5431    | 237.2654333  | 0.330822395 | 0.020129435 | 0.007275611 | 1.070225523 | 0.761347444 | 1.630234548 |
| 3352385 | ---       | ---             | ---         | ---         | ---         | ---         | ---          | ---         | ---         | ---         | ---         | ---         | ---         |
| 2627705 | TREX1     | NM_032015       | 765.9792333 | 813.4595667 | 752.0031333 | 152.8756    | 249.2231     | 0.326651857 | 0.353038154 | 0.007571901 | 1.061982533 | 1.090376732 | 1.630978337 |
| 3741502 | CARPL     | ENST00000376031 | 204.6256667 | 192.3251    | 174.7417667 | 98.39915667 | 160.5641     | 0.448892063 | 0.016918863 | 0.001885528 | 0.950590033 | 0.853929409 | 1.631762969 |
| 2899152 | HISTH2AC  | NM_013276       | 395.4776    | 380.0892333 | 374.4514333 | 339.9078667 | 555.3817667  | 0.168426178 | 0.661598181 | 0.001781238 | 0.961089157 | 0.946833483 | 1.633918544 |
| 2656500 | PSMD2     | NM_003512       | 1904.01     | 1833.701    | 1500.286333 | 1183.097667 | 1822.869333  | 0.620540044 | 0.130568009 | 0.00250704  | 0.963073198 | 0.867096387 | 1.634323659 |
| 3744229 | TIME107   | NM_002808       | 1513.008333 | 1694.846333 | 249.3307667 | 86.04090333 | 140.9783333  | 0.080962771 | 0.94069444  | 0.00087875  | 1.120183079 | 0.991591586 | 1.635427112 |
| 3482888 | GTF3A     | NM_032354       | 262.6254    | 309.5804667 | 249.3307667 | 86.04090333 | 140.9783333  | 0.080962771 | 0.94069444  | 0.00087875  | 1.120183079 | 0.991591586 | 1.635427112 |
| D32257  | ---       | ---             | ---         | ---         | ---         | ---         | ---          | ---         | ---         | ---         | ---         | ---         | ---         |
| 3457824 | CDCA7     | NM_031942       | 1363.051333 | 1281.122667 | 1173.107    | 619.6217    | 1019.7054333 | 0.315667716 | 0.053808566 | 0.001120666 | 1.033720947 | 0.962627175 | 1.643915965 |
| 3457824 | TIMELESS  | NM_003920       | 772.1426333 | 904.4179333 | 822.5653333 | 345.0673333 | 568.05       | 0.091860934 | 0.55217786  | 0.00054069  | 1.171309411 | 0.860647704 | 1.645690319 |
| 2327111 | PPH       | NM_006347       | 651.5018    | 716.5689    | 617.4434333 | 623.9677    | 1027.475667  | 0.291120547 | 0.593864557 | 0.000914327 | 1.065328215 | 0.947723296 | 1.646200452 |
| 2434129 | HIST2H2AB | NM_175065       | 2494.220667 | 2030.333667 | 1923.852333 | 210.035     | 3471.602667  | 0.009930962 | 0.006268563 | 0.01574825  | 0.814015253 | 0.771324029 | 1.649189898 |
| 3333358 | INCENP    | NM_001040684    | 358.4657667 | 438.7916667 | 499.6043    | 457.3945    | 754.5700333  | 0.122502091 | 0.012243424 | 0.000934198 | 1.224082486 | 1.376991462 | 1.649713832 |

|         |           |             |             |             |             |             |             |             |              |             |             |             |
|---------|-----------|-------------|-------------|-------------|-------------|-------------|-------------|-------------|--------------|-------------|-------------|-------------|
| 3401878 | NDUFA9    | 1119.549667 | 1199.857667 | 1182.117    | 476.568333  | 786.9769333 | 0.373766868 | 0.386554121 | 0.0021689313 | 1.071732414 | 1.055866161 | 1.651339488 |
| 3821908 | RNASEH2A  | 930.9149667 | 943.7251    | 1007.6854   | 550.5244    | 909.1764667 | 0.742059305 | 0.15449695  | 0.002486741  | 1.013760799 | 1.062467718 | 1.651473516 |
| 3952718 | UFD1L     | 902.7675667 | 987.8023    | 1050.49467  | 543.8296    | 898.4256333 | 0.410728474 | 0.299853104 | 0.005706705  | 1.084193385 | 1.163637802 | 1.652035184 |
| 3063685 | ---       | 3733.063    | 3770.728    | 3409.643    | 1831.049    | 3028.619333 | 0.832363619 | 0.211199137 | 0.001615215  | 1.01008957  | 0.913363369 | 1.654037511 |
| 2742935 | HSPA4L    | 331.2403    | 390.9488333 | 302.535     | 198.8768333 | 329.0989    | 0.342478439 | 0.689415089 | 0.001642091  | 1.180257455 | 0.913338953 | 1.654787511 |
| 2469252 | RNM2      | 1500.444667 | 1526.416333 | 1535.444    | 1328.830667 | 2199.850667 | 0.868993374 | 0.828498759 | 0.000389974  | 1.017308313 | 1.023328574 | 1.655478551 |
| 3812426 | RTTN      | 289.9246    | 319.3023    | 315.1033    | 344.7734    | 572.2917    | 0.446100775 | 0.505725683 | 0.000391557  | 1.101328759 | 1.086845663 | 1.659906788 |
| 2394626 | ACOT7     | 766.7608667 | 799.6909    | 767.6823    | 447.8809    | 743.7010667 | 0.511604442 | 0.385593888 | 0.000295695  | 1.042919737 | 1.060488462 | 1.660488462 |
| 4052881 | ---       | 509.1016    | 542.7053333 | 492.0234667 | 218.7053333 | 363.8907667 | 0.626239675 | 0.834247296 | 0.001350026  | 1.066005947 | 0.966454371 | 1.663840388 |
| 2827185 | LMB1      | 871.7914    | 1010.60667  | 988.1782667 | 530.1803    | 883.1634    | 0.175602585 | 0.281753149 | 0.006121156  | 1.159229796 | 1.133503114 | 1.665779358 |
| 3480020 | RB1       | 553.9418    | 580.7719    | 525.3636333 | 317.9277    | 530.1694    | 0.74010085  | 0.830055203 | 0.005978995  | 1.048434872 | 0.948445547 | 1.667578509 |
| 2407555 | MYCBP     | 217.1174667 | 234.0973333 | 180.372     | 151.7079333 | 253.0544667 | 0.590570529 | 0.300083245 | 0.006842938  | 1.078205899 | 0.830757667 | 1.669037136 |
| 2353773 | TFE2      | 445.4161333 | 463.5559667 | 394.4602    | 387.3423333 | 645.4912    | 0.753424194 | 0.323179889 | 0.003836216  | 1.040725587 | 0.885599284 | 1.66904349  |
| 3319009 | RNM1      | 1152.974    | 1354.722    | 1294.671667 | 1230.612    | 2057.047667 | 0.024349254 | 0.298526269 | 0.000630088  | 1.174980529 | 1.122897539 | 1.671564772 |
| 2895788 | HIST1H4I  | 614.9861    | 540.7226333 | 552.3570333 | 448.6164667 | 750.3318667 | 0.134771922 | 0.434415055 | 0.006935092  | 0.879243666 | 0.888161818 | 1.672544463 |
| 3565571 | VDH1      | 518.2820667 | 593.2976667 | 606.7663    | 394.6857333 | 680.6168667 | 0.25093723  | 0.734525186 | 0.003316563  | 1.144716859 | 1.048157918 | 1.67378451  |
| 3095786 | CSE1L     | 163.0704667 | 168.9048333 | 152.4333333 | 116.3640333 | 845.9970333 | 0.771232146 | 0.279660145 | 0.003158524  | 0.967619705 | 0.826345792 | 1.674111652 |
| 3872093 | POLA1     | 786.6006    | 843.3823667 | 804.0870333 | 324.8189    | 544.3076667 | 0.746749101 | 0.461738369 | 0.00133236   | 1.036159437 | 0.935115005 | 1.674735549 |
| 3878220 | ---       | 284.1775333 | 306.3619333 | 269.9893333 | 331.5760333 | 556.0111    | 0.316686537 | 0.308186842 | 0.001573641  | 1.072186274 | 1.022230384 | 1.675726587 |
| 3560832 | XRCC3     | 510.0545333 | 537.9001    | 531.8108    | 145.9624333 | 246.8029667 | 0.251117396 | 0.219083118 | 0.000665666  | 1.07876907  | 0.95007276  | 1.682970485 |
| 3662285 | NUP93     | 1330.641667 | 1412.946667 | 1316.520333 | 1159.377667 | 1961.099667 | 0.274457308 | 0.825109247 | 0.009732033  | 1.064593313 | 1.042654785 | 1.690866348 |
| 2843619 | HNRPA8    | 1464.537667 | 1461.4688   | 1215.0049   | 879.3940333 | 1488.792667 | 0.978623466 | 0.173945626 | 0.00055113   | 1.061853617 | 0.989387576 | 1.691510647 |
| 3442322 | CDC43     | 622.4912667 | 600.0857    | 602.1783333 | 244.8908    | 415.4526    | 0.709833347 | 0.004589437 | 0.01006223   | 0.997904003 | 0.829616696 | 1.692975629 |
| 3652691 | DX39      | 946.7141333 | 1129.493667 | 1059.158133 | 1166.123    | 1166.123    | 0.034246113 | 0.412225803 | 0.000951046  | 0.964006617 | 0.967366324 | 1.696481044 |
| 3587457 | ARHGAP11A | 903.6495667 | 1097.478    | 928.1017    | 533.2383    | 908.1751667 | 0.070280664 | 0.838110061 | 0.002302183  | 1.193067291 | 1.118772918 | 1.700117799 |
| 3413875 | TROAP     | 740.0941667 | 760.9158667 | 697.2105    | 647.5540333 | 1104.520667 | 0.398858871 | 0.02896633  | 0.004124084  | 1.214495132 | 1.02705931  | 1.703131914 |
| 3031754 | ABC8      | 358.4426    | 338.8684    | 307.2512333 | 223.8306333 | 382.1657667 | 0.537927429 | 0.124286855 | 0.002340347  | 1.028133852 | 0.942056473 | 1.705681066 |
| 2902178 | TCF19     | 498.5726667 | 547.9176667 | 560.9707667 | 176.2615    | 301.5148    | 0.221963627 | 0.157684835 | 0.002340347  | 0.945390978 | 0.857183921 | 1.707388131 |
| 3788224 | SLC25A10  | 231.811     | 189.1329    | 222.0711    | 285.3543333 | 488.8861667 | 0.068089468 | 0.568839594 | 0.00632141   | 1.098972534 | 1.125153471 | 1.70610655  |
| 3818660 | MCOL1     | 410.5652333 | 480.1709333 | 470.0417    | 258.8635333 | 443.6894667 | 0.013375868 | 0.416846666 | 0.001270894  | 0.815892698 | 0.957983443 | 1.713277417 |
| 3647864 | CCNF      | 317.9945    | 348.3603    | 392.8096667 | 517.4651    | 887.273667  | 0.186802489 | 0.086344728 | 0.000730637  | 1.169450822 | 1.14478119  | 1.715315108 |
| 2451200 | UBE2T     | 608.5046667 | 734.8876667 | 554.0743333 | 680.9665    | 1168.108667 | 0.203475435 | 0.261706736 | 0.000500355  | 1.095554463 | 0.970457164 | 1.715464593 |
| 3102283 | RDH10     | 809.0746667 | 802.2607    | 717.957     | 329.4130333 | 565.7916    | 0.90334242  | 0.354283688 | 0.001832214  | 0.991578074 | 0.887380398 | 1.717575028 |

|         |           |                  |             |             |             |             |             |             |             |             |             |             |             |
|---------|-----------|------------------|-------------|-------------|-------------|-------------|-------------|-------------|-------------|-------------|-------------|-------------|-------------|
| 2311679 | MFSD2     | NM_032793        | 72.89796667 | 73.81214    | 48.52808667 | 120.2930333 | 207.1769333 | 0.835367441 | 0.151571689 | 0.09230694  | 1.01532578  | 0.667529995 | 1.72240126  |
| 3709888 | CD8B      | NM_001251        | 1484.954    | 1579.136667 | 1380.751667 | 1380.751667 | 191.2111    | 329.5424    | 0.180140471 | 0.00407513  | 1.063423962 | 0.929827905 | 1.723448063 |
| 3744283 | AURKB     | NM_004217        | 1175.62333  | 1175.62333  | 1133.362667 | 841.944667  | 1451.199667 | 0.12076422  | 0.483784377 | 0.006837394 | 1.065165322 | 1.027366592 | 1.723634866 |
| 3887049 | UBE2C     | NM_181802        | 1310.984    | 1229.147    | 1066.060833 | 711.0095667 | 1225.837667 | 0.305488991 | 0.050819575 | 0.007359217 | 0.937568746 | 0.81316988  | 1.724082837 |
| 3204061 | Cbrf165   | NM_188573        | 210.9262    | 223.9575333 | 271.4758667 | 103.2944633 | 178.266     | 0.395486991 | 0.00325995  | 0.000813111 | 1.061781482 | 1.28706565  | 1.725804019 |
| 2538000 | ADI1      | NM_018269        | 461.5359333 | 468.3145667 | 354.6243667 | 155.182     | 267.9856    | 0.917460239 | 0.141542971 | 0.002198685 | 1.014687119 | 0.768357003 | 1.726911628 |
| 2662331 | CANK1     | NM_003656        | 120.1654667 | 93.34488667 | 81.71822667 | 95.45710333 | 164.9295    | 0.087682855 | 0.044894474 | 0.002196608 | 0.776802931 | 0.680047012 | 1.727786558 |
| 3479181 | POLE      | NM_006231        | 731.3341    | 829.8271333 | 730.9767333 | 504.6337333 | 872.5082    | 0.17425152  | 0.996246634 | 0.001391168 | 1.194675839 | 0.95951135  | 1.728986162 |
| 2730714 | DOCK      | NM_000788        | 317.8233667 | 343.1503333 | 294.3024667 | 164.1351333 | 283.8005    | 0.686412083 | 0.678256789 | 0.08677316  | 1.079688812 | 0.925993799 | 1.729066131 |
| 3920003 | CHAF1B    | NM_005441        | 1154.673    | 1291.144    | 1371.279333 | 751.0778    | 1299.003    | 0.140053089 | 0.015534585 | 0.007220321 | 1.118190172 | 1.187591061 | 1.729518567 |
| 3723120 | --        | AY358101         | 263.6140667 | 316.7588    | 291.6573667 | 135.6977333 | 235.3101667 | 0.342620066 | 0.35205207  | 0.008598579 | 1.201600522 | 1.106380135 | 1.73415256  |
| 3934669 | SUMO3     | NM_006936        | 2790.328667 | 2779.388333 | 2793.966    | 463.2441    | 805.5648667 | 0.805632933 | 0.971580765 | 0.00146467  | 0.966079195 | 1.00130355  | 1.739864116 |
| 2782292 | --        | ENST000000313239 | 138.4942667 | 167.1005667 | 141.007667  | 167.6098333 | 291.6480667 | 0.317698478 | 0.93733081  | 0.007222695 | 1.206552233 | 1.018288596 | 1.740133905 |
| 3983435 | PRF1      | NM_005041        | 49.78725667 | 54.25685    | 60.68917    | 89.96541333 | 156.5681    | 0.602510339 | 0.868908891 | 0.00300392  | 1.089807988 | 1.018115345 | 1.740314362 |
| 2650199 | --        | hsa-mir-16-2     | 1121.608767 | 1167.230333 | 915.0175667 | 391.1202333 | 681.4637333 | 0.830413087 | 0.194008687 | 0.00725718  | 1.040675116 | 0.815808144 | 1.742338226 |
| 2720251 | NCAPG     | NM_022346        | 1043.011767 | 1162.428    | 961.2437    | 603.041667  | 1052.667933 | 0.240435604 | 0.617459529 | 0.005756592 | 1.13366688  | 0.940779128 | 1.74386226  |
| 359089  | DNMT1     | NM_001379        | 1676.122667 | 1962.41     | 1678.074667 | 117.6076    | 2051.025333 | 0.0715769   | 0.985512776 | 0.003758155 | 1.17080333  | 1.001164593 | 1.743956456 |
| 3358479 | HYL1      | NM_145014        | 195.2455    | 224.4935667 | 181.9694333 | 104.9079633 | 183.0294    | 0.085492598 | 0.13196675  | 0.006825079 | 1.149801489 | 0.932105648 | 1.746331044 |
| 2334319 | TOE1      | NM_025077        | 225.3281333 | 225.3281333 | 180.252     | 89.5370667  | 156.5192    | 0.945561446 | 0.097395684 | 0.003504151 | 0.985740267 | 0.78854625  | 1.748094095 |
| 2320374 | FBX06     | NM_018438        | 258.8168    | 297.9226    | 286.406     | 138.4300667 | 242.0398667 | 0.162415036 | 0.13196675  | 0.000930597 | 1.151094519 | 1.029322671 | 1.748387342 |
| 3776139 | NDG80     | NM_006101        | 428.8843    | 573.4155667 | 429.8705667 | 157.2593333 | 275.3009    | 0.030766102 | 0.99031628  | 0.003223442 | 1.336993606 | 1.00229961  | 1.750211014 |
| 2333136 | CDC20     | NM_001255        | 1088.722333 | 1027.202367 | 940.6720333 | 876.4764333 | 1534.241    | 0.492092169 | 0.014291422 | 0.006174676 | 0.943493428 | 0.864014639 | 1.750464635 |
| 2330773 | CDC48     | NM_018101        | 319.6771667 | 378.7090333 | 378.6409    | 186.509667  | 326.7265    | 0.262466721 | 0.100192009 | 0.000978431 | 1.184660879 | 1.187579903 | 1.75181928  |
| 3607183 | MRPS11    | NM_022839        | 291.6659333 | 355.6420667 | 390.6166333 | 172.5436    | 302.9959333 | 0.062839231 | 0.003767175 | 0.004854162 | 1.219347294 | 1.339260396 | 1.756054315 |
| 2900074 | HIST1H2BN | NM_003520        | 1309.636333 | 1243.233    | 1032.448733 | 734.4948333 | 1296.057    | 0.307046054 | 0.016102894 | 0.001009465 | 0.949296357 | 0.788347656 | 1.764555639 |
| 3061319 | CDK6      | NM_001259        | 1557.304    | 1539.496667 | 1470.985333 | 369.9062    | 652.9664667 | 0.891437952 | 0.160294087 | 0.002316166 | 0.988565281 | 0.94457173  | 1.765221742 |
| 3910785 | AURKA     | NM_198433        | 869.7663    | 933.705333  | 851.2207    | 421.0862    | 744.0904667 | 0.679475489 | 0.898983634 | 0.00085348  | 1.073587852 | 0.978677491 | 1.767073978 |
| 3887342 | HIRP3     | NM_003609        | 172.3366333 | 194.2836333 | 177.9136667 | 114.0306333 | 201.5983667 | 0.30294313  | 0.786530166 | 0.008926413 | 1.127349592 | 1.032362436 | 1.767931658 |
| 3920038 | C21orf45  | NM_018248        | 1102.266    | 1108.319667 | 1094.651667 | 667.9790333 | 1182.583333 | 0.917840317 | 0.851927991 | 0.002009816 | 1.00549202  | 0.993092109 | 1.7704005   |
| 2752725 | NEIL3     | NM_018248        | 386.8193333 | 413.2248333 | 334.8982333 | 349.4550667 | 618.8222667 | 0.580218899 | 0.212947194 | 0.003720753 | 1.068263134 | 0.865774289 | 1.770820703 |
| 3333226 | FEN1      | NM_004111        | 458.2573333 | 563.9815    | 539.3801667 | 618.5152333 | 1095.427    | 0.00462381  | 0.217968814 | 0.00062994  | 1.230709165 | 1.177024627 | 1.771059047 |
| 2377886 | MC1M6     | NM_005915        | 742.7467333 | 815.1787    | 804.9223333 | 350.4798333 | 621.3709667 | 0.605646736 | 0.635770289 | 0.002734746 | 1.087516109 | 1.083786228 | 1.772921107 |
| 2747688 | EXOSC9    | NM_001034184     | 642.3633    | 702.7351333 | 596.7404333 | 727.8002    | 1292.459    | 0.304016854 | 0.658294765 | 0.000162008 | 1.089889939 | 0.932090039 | 1.77584315  |
| 3884882 | FAM83D    | NM_030919        | 939.9532    | 921.7518    | 894.5483667 | 719.2031667 | 1276.354333 | 0.676605204 | 0.228840862 | 0.002553535 | 0.980635844 | 0.941055753 | 1.777459267 |



|         |               |         |             |              |             |             |             |              |              |             |             |             |
|---------|---------------|---------|-------------|--------------|-------------|-------------|-------------|--------------|--------------|-------------|-------------|-------------|
| 3004628 | ZNF107        | 3004628 | 276.6874667 | 265.02252333 | 85.35789333 | 151.7648333 | 0.391985549 | 0.472383983  | 0.003205589  | 1.185919649 | 1.135922178 | 1.777962415 |
| 3056414 | RF02          | 3056414 | 864.2670667 | 748.1678     | 289.276     | 516.1406    | 0.740094602 | 0.401602179  | 0.002168027  | 1.049046842 | 0.908125622 | 1.784249544 |
| 2444451 | GAS5          | 2444451 | 403.8526333 | 315.2358     | 139.0479667 | 248.1564    | 0.861184629 | 0.198620422  | 0.004497033  | 1.010910791 | 0.795880641 | 1.784681977 |
| 2366438 | NUF2          | 2366438 | 336.0113    | 336.9636667  | 239.5343333 | 430.3963    | 0.982965653 | 0.002481031  | 0.05976278   | 1.169015485 | 1.002843243 | 1.796984663 |
| 2366581 | --            | 2366581 | 288.7028    | 327.9625     | 137.7851    | 247.9284    | 0.368361433 | 0.695340923  | 0.08002999   | 1.135986558 | 0.941417726 | 1.799394684 |
| 3090697 | CDCA2         | 3090697 | 441.3339667 | 425.3142     | 385.6875333 | 694.8259333 | 0.664062837 | 0.00409168   | 0.00409168   | 1.104520923 | 0.963701487 | 1.801525518 |
| 3619945 | OIP5          | 3619945 | 436.1301333 | 487.8737     | 186.2675667 | 335.6471    | 0.121359257 | 0.208230062  | 0.05678892   | 1.155179142 | 1.118642494 | 1.801962124 |
| 2858592 | DEPDC1B       | 2858592 | 363.7932667 | 437.7051667  | 118.1129667 | 213.1517667 | 0.18274069  | 0.442545318  | 0.001888428  | 1.236687448 | 1.203170061 | 1.803021964 |
| 2469296 | --            | 2469296 | 150.2233333 | 137.6723667  | 118.1129667 | 757.121421  | 0.757247603 | 0.08957719   | 0.08957719   | 1.02528657  | 0.916451284 | 1.804643238 |
| 3508330 | HSPH1         | 3508330 | 684.6606667 | 659.694      | 647.0601333 | 630.8523667 | 0.15754672  | 0.0008957719 | 0.0008957719 | 0.963498503 | 0.945046445 | 1.806242721 |
| 2957126 | MCM3          | 2957126 | 744.7005    | 971.3763333  | 734.0938667 | 0.035748756 | 0.139009145 | 4.16162E-05  | 1.286087494  | 1.30438523  | 1.30438523  | 1.806837509 |
| 3866898 | LIG1          | 3866898 | 384.8175667 | 491.2748     | 484.2848333 | 843.1422    | 0.004429883 | 0.058534186  | 0.00059049   | 1.276843383 | 1.258479018 | 1.808406708 |
| 2793951 | HMG82         | 2793951 | 306.5634667 | 373.184333   | 466.2348333 | 843.1422    | 0.004429883 | 0.058534186  | 0.00059049   | 1.276843383 | 1.258479018 | 1.808406708 |
| 2742109 | FGF2          | 2742109 | 612.1646667 | 667.3507333  | 316.0855667 | 574.6275    | 0.278491255 | 0.31949387   | 0.00940785   | 1.219057305 | 0.794835414 | 1.81794919  |
| 3708874 | MRDU1         | 3708874 | 2385.255    | 2277.900333  | 806.5593333 | 104.287     | 0.498273972 | 0.320871181  | 0.007165181  | 1.090149056 | 0.896401513 | 1.819110723 |
| 3807510 | FANCI         | 3807510 | 664.7497667 | 778.3302     | 536.8612333 | 1467.306667 | 0.215834912 | 0.060648942  | 0.00041072   | 0.954892373 | 0.923845179 | 1.819217268 |
| 2804284 | DNF2P/62E1312 | 2804284 | 1284.241667 | 1329.401     | 641.1458    | 977.3596667 | 0.013227366 | 0.930267683  | 0.006631264  | 1.170892024 | 1.009548806 | 1.821165519 |
| 3144973 | RAD54B        | 3144973 | 368.9663667 | 384.5979333  | 1193.742    | 1170.654333 | 0.526423767 | 0.29996625   | 0.000498946  | 1.035164202 | 0.929530657 | 1.824942878 |
| 3988721 | ZWILCH        | 3988721 | 677.2133    | 784.4079667  | 207.8748333 | 380.9243667 | 0.125264139 | 0.85487254   | 0.002846658  | 1.042284523 | 0.971716663 | 1.83246986  |
| 2463425 | FH            | 2463425 | 488.2295667 | 514.6801333  | 463.7746333 | 582.2463667 | 0.613482927 | 0.762498379  | 0.001349781  | 1.054176495 | 0.934269503 | 1.83246986  |
| 3394183 | H2AFX         | 3394183 | 646.6109    | 719.0341333  | 458.237     | 316.8715667 | 0.089778723 | 0.06626221   | 0.004579952  | 1.11200435  | 0.938568721 | 1.837483788 |
| 2427930 | WDR77         | 2427930 | 784.1106667 | 708.8725333  | 620.4037667 | 527.6205    | 0.17007877  | 0.142375063  | 0.000458794  | 0.904046538 | 0.791219849 | 1.84190669  |
| 3903146 | E2F1          | 3903146 | 373.3129    | 388.1802333  | 412.9646333 | 142.4223    | 0.616809614 | 0.4928557    | 0.03747127   | 1.106215813 | 1.06215813  | 1.843320025 |
| 3262165 | TAF5          | 3262165 | 241.2575333 | 300.2362667  | 259.5920333 | 134.8399333 | 0.049692865 | 0.478687606  | 0.00410077   | 1.039825394 | 1.075995554 | 1.84374689  |
| 2965739 | --            | 2965739 | 977.8167667 | 1015.025433  | 919.3087    | 268.4755333 | 495.2705    | 0.628681836  | 0.008474114  | 1.2444638   | 0.94015459  | 1.8443604   |
| 2883440 | ADAM19        | 2883440 | 231.1435333 | 167.4544     | 190.3005333 | 453.2562    | 0.014271565 | 0.248224786  | 0.006271673  | 0.724460674 | 0.82330027  | 1.85007302  |
| 3995545 | NCAPD3        | 3995545 | 528.5819667 | 662.6946333  | 452.7772333 | 837.9141333 | 0.039599242 | 0.408870305  | 0.001590553  | 1.253721608 | 1.162395375 | 1.850610127 |
| 2417528 | DEPDC1        | 2417528 | 535.2370333 | 574.9845333  | 277.3653667 | 513.2830333 | 0.614803089 | 0.4755722    | 0.001130919  | 1.074261491 | 0.881281321 | 1.850633141 |
| 3599811 | KIF23         | 3599811 | 951.3678333 | 1086.49067   | 502.132     | 930.5291333 | 0.117304522 | 0.700041017  | 0.007159609  | 0.955697893 | 0.955697893 | 1.853142467 |
| 3238395 | HSPA14        | 3238395 | 445.3624333 | 483.4726     | 339.1106667 | 626.4873    | 0.191355962 | 0.496468101  | 0.001439173  | 1.08557113  | 0.949206812 | 1.853367664 |
| 3415887 | ESPL1         | 3415887 | 365.3768333 | 417.9923333  | 337.8750667 | 626.9097667 | 0.053345327 | 0.717538479  | 0.001118551  | 1.444005533 | 1.042772906 | 1.856547399 |
| 2354098 | KIF23         | 2354098 | 736.0966333 | 909.1700667  | 680.2119    | 479.5217667 | 0.208249699 | 0.650166197  | 0.001796557  | 1.200000141 | 1.1610814   | 1.860389584 |
| 3488074 | RF03          | 3488074 | 735.8431    | 877.9829667  | 706.136     | 426.8897333 | 0.083649733 | 0.705840789  | 0.006845212  | 1.193179888 | 0.959628486 | 1.867206692 |
| 3204682 | --            | 3204682 | 175.108     | 165.4819333  | 179.5964333 | 167.2154333 | 0.571544734 | 0.854715823  | 6.82851E-05  | 0.94502763  | 1.025632372 | 1.867888789 |

|         |          |             |              |             |             |             |             |             |             |             |             |             |
|---------|----------|-------------|--------------|-------------|-------------|-------------|-------------|-------------|-------------|-------------|-------------|-------------|
| 3590014 | CASC5    | 608.5746    | 774.3437     | 669.0377    | 316.5653333 | 583.082     | 0.01904107  | 0.512176245 | 0.005667769 | 1.27238912  | 1.099351994 | 1.873490043 |
| 3176999 | RM11     | 321.6577667 | 330.62529667 | 275.5629667 | 151.7525    | 284.358     | 0.858845931 | 0.333458136 | 0.00585921  | 1.027180564 | 0.856696139 | 1.873827449 |
| 2968484 | TOR3A    | 486.1813    | 406.5096     | 383.4084333 | 231.1085    | 433.2468    | 0.162993504 | 0.098161604 | 0.000406969 | 0.871998941 | 0.822444901 | 1.874646757 |
| 3168508 | MELK     | 1752.842667 | 204.733      | 1670.820333 | 764.037333  | 1434.94     | 0.063709166 | 0.53800028  | 0.004121434 | 1.166523978 | 0.953206106 | 1.878118166 |
| 2859667 | CENPK    | 542.9022667 | 634.8843333  | 473.6000667 | 166.1761333 | 312.8120667 | 0.346256647 | 0.009885004 | 0.000985004 | 1.169426566 | 0.872348663 | 1.882412717 |
| 3151534 | ATAD2    | 1004.6828   | 1192.283333  | 1147.157133 | 536.9398667 | 1011.8588   | 0.168620271 | 0.402258373 | 0.004852988 | 1.186726132 | 1.141810264 | 1.884491845 |
| 2665572 | SGO1     | 228.7011    | 258.6037333  | 203.0832667 | 125.954333  | 238.0178333 | 0.369077214 | 0.57198485  | 0.004812974 | 1.130749845 | 0.887985526 | 1.889756883 |
| 2542795 | SDC1     | 120.1997933 | 98.07968667  | 87.534      | 156.4771333 | 283.0178333 | 0.189201009 | 0.159788033 | 0.005460928 | 0.815972174 | 0.728237525 | 1.891297642 |
| 2521278 | ---      | 198.6000333 | 235.81       | 203.524     | 149.5112    | 283.0269333 | 0.297504854 | 0.804439242 | 0.000781488 | 1.187361331 | 1.024793383 | 1.893014927 |
| 3226592 | WDR34    | 696.29889   | 643.3688667  | 619.0008    | 300.8166    | 571.6126667 | 0.000997661 | 0.043053282 | 0.00402047  | 0.923985183 | 0.888987186 | 1.900203202 |
| 3904566 | DSN1     | 510.2921333 | 663.8688333  | 593.0413    | 253.2444667 | 481.5231    | 0.031119339 | 0.120803208 | 0.001623469 | 1.300952513 | 1.162160381 | 1.901416076 |
| 3258444 | CEP55    | 610.6001    | 665.9545333  | 560.9663    | 392.2277333 | 746.6852    | 0.164582293 | 0.595521768 | 5.30225E-05 | 0.918713082 | 0.918713082 | 1.903703223 |
| 3655628 | KIF2F    | 837.9489333 | 958.4206333  | 955.7658333 | 579.5856    | 1106.069    | 0.026221964 | 0.103638228 | 0.003401414 | 1.14376974  | 1.140601528 | 1.903703223 |
| 3875195 | MCU8     | 668.8448    | 728.6302667  | 582.7608667 | 250.7376667 | 478.5851667 | 0.406347056 | 0.266724252 | 0.001098776 | 1.089386158 | 0.871278655 | 1.908707181 |
| 2840002 | CCDC99   | 772.4182667 | 798.9968     | 729.5157333 | 184.4529333 | 352.5825    | 0.820983867 | 0.689126409 | 0.00497454  | 1.034409509 | 0.944456863 | 1.911503892 |
| 2897376 | ANLN     | 521.5417333 | 718.0689     | 549.0011    | 373.5295667 | 714.3164667 | 0.201128161 | 0.81294982  | 0.002456046 | 1.376819637 | 1.026503073 | 1.912347858 |
| 3639031 | PRC1     | 718.0975667 | 835.075667   | 1086.3261   | 689.3386    | 1285.927333 | 0.058246827 | 0.532404891 | 0.006912741 | 1.16289987  | 0.963884759 | 1.921191345 |
| 2899146 | HIST1H4C | 1127.438667 | 1086.3261    | 982.5253    | 817.1153867 | 1570.305333 | 0.78390767  | 0.243430211 | 0.000288386 | 0.963534543 | 0.871466741 | 1.921768983 |
| 3367036 | CCDC34   | 214.9323667 | 277.3595667  | 241.7365333 | 134.6521    | 258.9556667 | 0.067029812 | 0.489017606 | 0.001941136 | 1.09264099  | 1.124709773 | 1.923146142 |
| 3720896 | CCDC6    | 635.4593333 | 684.3252     | 553.5680667 | 764.1944    | 1469.658    | 0.183540905 | 0.268259884 | 0.000809661 | 0.974793498 | 0.871135255 | 1.923146142 |
| 3866223 | MYBL2    | 1368.509333 | 1334.014     | 1398.650333 | 692.3474667 | 1335.222    | 0.328868638 | 0.715044504 | 8.78783E-06 | 1.022024695 | 1.022024695 | 1.928543202 |
| 2674808 | TRAP1    | 166.571667  | 217.1589667  | 189.4148333 | 98.67489667 | 190.9493333 | 0.16566038  | 0.363545525 | 0.009092004 | 1.303696125 | 1.137136486 | 1.935135883 |
| 3758317 | BRCA1    | 484.2006667 | 572.2163333  | 468.8505    | 284.2494    | 551.0151667 | 0.0775112   | 0.804157054 | 0.001975932 | 1.181769611 | 0.970363183 | 1.938491925 |
| 3831062 | WDR62    | 843.281     | 1042.430333  | 892.2801    | 125.5241    | 243.5728333 | 0.013862338 | 0.294900136 | 0.007642477 | 1.236159991 | 1.058105305 | 1.940446761 |
| 3565663 | DLG7     | 554.2331    | 713.6054667  | 619.2849667 | 429.1284    | 832.8207    | 0.073955099 | 0.404165878 | 0.000472477 | 1.287554761 | 1.117372756 | 1.940726132 |
| 3984655 | CENPI    | 509.7295667 | 595.1085333  | 570.4576667 | 247.7229    | 481.8522667 | 0.173423035 | 0.3949646   | 0.000925032 | 1.167498557 | 1.119137788 | 1.945126053 |
| 2798915 | TRIP13   | 895.4874333 | 867.0302667  | 848.2893667 | 360.0823667 | 701.3037667 | 0.172681014 | 0.630808836 | 0.001308252 | 0.96822159  | 0.947293435 | 1.947620041 |
| 3896200 | PCNA     | 667.7257    | 740.2291     | 789.8110333 | 789.0415333 | 1537.326667 | 0.130400063 | 0.270508846 | 0.00262758  | 1.108582611 | 1.182837553 | 1.948346952 |
| 3940055 | GTSE1    | 401.6243    | 473.2210667  | 479.9772    | 385.9388333 | 752.6469667 | 0.006592923 | 0.88679832  | 0.003107849 | 1.178268015 | 1.177662059 | 1.950186707 |
| 3082181 | NCAPG2   | 551.3277333 | 529.1882     | 529.1882    | 314.2721    | 613.126     | 0.268772484 | 0.80644063  | 0.004775367 | 1.204298211 | 0.959843244 | 1.959843244 |
| 3704980 | FANCA    | 1033.343833 | 1166.476667  | 1047.4615   | 559.2962333 | 1093.738667 | 0.018992798 | 0.808094103 | 0.000335721 | 1.12818185  | 1.013073889 | 1.955652368 |
| 3257338 | MPHOSPH1 | 222.3436333 | 331.3637667  | 276.8624    | 141.1190333 | 276.7773333 | 0.016387863 | 0.330783105 | 0.005376588 | 1.480322712 | 1.23419557  | 1.961304062 |
| 3747199 | PRR6     | 561.4466333 | 486.6174     | 461.3245333 | 306.2478333 | 602.1757667 | 0.206134154 | 0.044385061 | 0.001975378 | 0.862857951 | 0.821671208 | 1.966302729 |
| 3602288 | BLM      | 240.6541333 | 308.3457     | 276.55      | 162.6538    | 320.2002333 | 0.173090197 | 0.198438401 | 0.000115533 | 1.281281546 | 1.149159588 | 1.96884166  |

|         |           |             |             |             |              |             |             |             |             |             |             |             |
|---------|-----------|-------------|-------------|-------------|--------------|-------------|-------------|-------------|-------------|-------------|-------------|-------------|
| 3484641 | BRCA2     | NM_000059   | 414.6709    | 395.9175    | 123.8201     | 244.6125    | 0.03703301  | 0.27812292  | 0.002264501 | 1.26881091  | 1.180943416 | 1.975547589 |
| 2402416 | --        | 207.6004    | 178.5857    | 137.2100667 | 271.1659667  | 0.182990086 | 0.275483805 | 0.004569481 | 0.005177707 | 1.189206021 | 0.860237745 | 1.976283324 |
| 3000953 | UPP1      | 526.574     | 447.5175    | 107.478     | 213.3271667  | 0.053691474 | 0.031227155 | 0.005177707 | 0.005177707 | 0.849866306 | 0.813419133 | 1.984844961 |
| 3629103 | KIAA0101  | 906.1179    | 956.4026667 | 412.4773    | 819.6404667  | 0.585720713 | 0.541490741 | 0.000203252 | 0.000203252 | 1.055494728 | 1.066444659 | 1.987116544 |
| 3258910 | HELLS     | 524.4642667 | 653.4132333 | 348.2208    | 692.1925333  | 0.105660328 | 0.605358882 | 0.001545252 | 0.003442602 | 1.245867974 | 1.111425386 | 1.987797978 |
| 3080283 | --        | 413.7499667 | 422.5396333 | 186.2431667 | 370.5982667  | 0.88496628  | 0.135832486 | 0.008319548 | 0.008319548 | 0.944444659 | 0.79354528  | 1.988662357 |
| 2946283 | HIST1H4H  | 1088.145    | 1027.692333 | 922.7151333 | 328.3293333  | 0.42961995  | 0.105884362 | 0.002028554 | 0.002028554 | 0.847970751 | 0.847970751 | 1.992098941 |
| 2947100 | HIST1H2AM | 277.1409333 | 272.7421333 | 223.9696667 | 146.7174     | 293.5006667 | 0.912329457 | 0.000495287 | 0.000495287 | 0.984127931 | 0.808143582 | 2.000448936 |
| 3156642 | NFKB1L2   | 477.4572333 | 496.3370333 | 430.8843333 | 863.0065333  | 0.117171405 | 0.350388261 | 0.000475458 | 0.000475458 | 0.945530213 | 0.945530213 | 2.003816433 |
| 3722770 | --        | 187.5139    | 218.4703333 | 111.9345667 | 224.3845333  | 0.387810372 | 0.894896558 | 0.00052063  | 0.00052063  | 1.165088739 | 0.97459175  | 2.004604476 |
| 3962165 | CENPM     | 316.8915333 | 290.9307667 | 174.8396    | 351.6307     | 0.050681834 | 0.011234442 | 0.004446238 | 0.004446238 | 0.918076806 | 0.839740748 | 2.011161659 |
| 3534765 | PPL5      | 135.3321    | 165.1502667 | 104.98297   | 211.6318667  | 0.137173283 | 0.81727285  | 0.00257872  | 0.00257872  | 1.220392403 | 0.971864768 | 2.015868542 |
| 2471316 | --        | 229.7232    | 264.8111333 | 210.7439    | 97.8894667   | 0.4528053   | 0.496453515 | 0.003201116 | 0.003201116 | 1.152740051 | 0.917381875 | 2.019859988 |
| 2908100 | POLH      | 262.1488333 | 481.6036667 | 175.0581    | 354.1406333  | 0.618270462 | 0.604673363 | 0.000569816 | 0.000569816 | 1.081187235 | 0.896512443 | 2.02298913  |
| 3728776 | RAD51C    | 406.2265333 | 481.6036667 | 305.3372333 | 621.0360667  | 0.116689197 | 0.749892287 | 0.000569816 | 0.000569816 | 1.185554431 | 1.045520578 | 2.033934588 |
| 2946215 | HIST1H3B  | 2031.006    | 1913.109667 | 1072.395333 | 2189.070333  | 0.21331092  | 0.387142527 | 0.000100973 | 0.000100973 | 0.941957195 | 0.926068568 | 2.041977616 |
| 3677315 | PKMYT1    | 1111.378667 | 1051.066333 | 568.2457    | 1160.345     | 0.806187575 | 0.359287441 | 0.000100973 | 0.000100973 | 0.895967891 | 0.924108918 | 2.048177587 |
| 2494484 | NCAPH     | 480.4205333 | 577.0303333 | 498.1259333 | 837.7060667  | 0.170028113 | 0.074299004 | 2.30008E-05 | 2.30008E-05 | 1.201093611 | 1.104188927 | 2.058174981 |
| 2947063 | HIST1H2AK | 870.4232333 | 807.2205667 | 782.9233333 | 1025.2303333 | 0.13514407  | 0.488326272 | 0.002062285 | 0.002062285 | 0.92738858  | 0.975932206 | 2.064488014 |
| 2714955 | TACC3     | 713.4720667 | 841.9025333 | 750.4139667 | 1616.343667  | 0.407888186 | 0.763276496 | 0.000239898 | 0.000239898 | 1.180007701 | 1.05177764  | 2.064922631 |
| 2855058 | OXC11     | 313.6875333 | 359.8916    | 286.2340333 | 591.0511333  | 0.046842034 | 0.582839101 | 0.007451857 | 0.007451857 | 0.987958293 | 0.987958293 | 2.06940988  |
| 3765580 | BRIP1     | 254.0118333 | 312.0138    | 177.1868333 | 367.7553333  | 0.404233328 | 0.368893186 | 0.001986515 | 0.001986515 | 1.147293283 | 1.131246248 | 2.075522918 |
| 3587495 | SCG5      | 23.75444    | 20.91709    | 84.98401333 | 176.4630333  | 0.625588177 | 0.312178415 | 0.000985669 | 0.000985669 | 0.880554962 | 0.730050466 | 2.076426217 |
| 2465395 | ZNF695    | 112.8916633 | 135.8826433 | 72.12907    | 149.8728333  | 0.440038597 | 0.259433491 | 0.008192197 | 0.008192197 | 1.203655251 | 0.826404896 | 2.077842309 |
| 3527418 | PARP2     | 510.1408333 | 586.6838667 | 306.4817    | 639.7829667  | 0.143846455 | 0.835455538 | 0.008428233 | 0.008428233 | 1.150042946 | 1.036116759 | 2.087507689 |
| 3158767 | RECQL4    | 256.5208667 | 268.2504333 | 359.1034333 | 750.4212667  | 0.492055855 | 0.216149039 | 0.002169821 | 0.002169821 | 1.045725585 | 0.83167501  | 2.089707659 |
| 3589697 | BUB1B     | 656.2806667 | 774.0030333 | 451.3363    | 945.7087667  | 0.083404124 | 0.927637363 | 0.002824668 | 0.002824668 | 1.179364783 | 1.013705872 | 2.095332771 |
| 3750785 | SPAG5     | 457.5698667 | 538.5825    | 352.5891333 | 740.3216667  | 0.178281549 | 0.838414986 | 0.000917749 | 0.000917749 | 1.177049756 | 1.021381216 | 2.098672385 |
| 3607698 | C15orf42  | 355.3179333 | 388.8201867 | 320.8228667 | 673.3197667  | 0.218374007 | 0.739635295 | 0.00182886  | 0.00182886  | 1.093725169 | 1.073896065 | 2.100039912 |
| 2899206 | HIST1H2BF | 1801.330667 | 1397.711333 | 1166.735667 | 2450.484333  | 0.035194519 | 0.024147835 | 0.000558136 | 0.000558136 | 0.775932681 | 0.774463027 | 2.100239907 |
| 3789542 | CEP76     | 92.51275    | 117.0069033 | 60.80461333 | 127.7463333  | 0.318233995 | 0.123016261 | 0.003272151 | 0.003272151 | 1.264765163 | 1.328440367 | 2.106931586 |
| 3502829 | GAS6      | 411.5826    | 382.9067667 | 289.9795667 | 609.6599     | 0.240864703 | 0.047083375 | 0.006120281 | 0.006120281 | 0.930373006 | 0.861662681 | 2.102430904 |
| 3817501 | CHAF1A    | 535.0642667 | 646.0776    | 289.1624    | 608.0454333  | 0.037498056 | 0.249367455 | 0.001089882 | 0.001089882 | 1.207476635 | 1.102704111 | 2.102781905 |

|         |           |           |             |             |              |             |             |             |             |              |             |             |             |
|---------|-----------|-----------|-------------|-------------|--------------|-------------|-------------|-------------|-------------|--------------|-------------|-------------|-------------|
| 3088617 | NDUFA4    | NM_02489  | 203.1816667 | 217.538     | 162.6771333  | 32.69588333 | 68.75948    | 0.826390276 | 0.469846529 | 0.0007766339 | 1.070657622 | 0.800648681 | 2.103001142 |
| 3850660 | SPC24     | NM_182513 | 350.3690333 | 417.5390667 | 425.2129667  | 124.8402    | 264.0884    | 0.063959642 | 0.12686065  | 0.002499224  | 1.191712243 | 1.213614578 | 2.115411542 |
| 3850668 | CDCA5     | NM_080668 | 477.8541    | 499.4073333 | 555.4986     | 268.8442    | 569.5225    | 0.489392663 | 0.12298156  | 0.005161429  | 1.045098772 | 1.162485788 | 2.118410961 |
| 3852565 | ASF1B     | NM_018154 | 466.8367333 | 565.7243333 | 494.5173     | 415.3166    | 882.7056333 | 0.027175012 | 0.387900223 | 0.003779964  | 1.211824805 | 1.059293892 | 2.125300092 |
| 2946324 | HIST1H3D  | NM_003530 | 1223.790333 | 1187.904333 | 1124.311667  | 675.9441333 | 1438.27     | 0.718695224 | 0.234973567 | 0.000999587  | 0.97067635  | 0.918712655 | 2.12779419  |
| 3216319 | ZNF367    | NM_153695 | 469.1241333 | 595.4674333 | 457.4396     | 135.2621    | 287.8777333 | 0.004806706 | 0.781811836 | 0.00848395   | 1.269317631 | 0.975092875 | 2.128295608 |
| 3440598 | FOXM1     | NM_202002 | 924.7432333 | 1000.740267 | 1002.0790675 | 322.7018    | 687.3683    | 0.223330711 | 0.403700517 | 0.001877782  | 1.082181767 | 1.083629521 | 2.130041729 |
| 2742985 | PLK4      | NM_014264 | 196.3124    | 217.8578333 | 167.4275     | 100.0072633 | 214.0741667 | 0.601708115 | 0.471345163 | 0.003635731  | 1.115432678 | 0.857229239 | 2.140586189 |
| 3129149 | PBK       | NM_018492 | 215.7137    | 255.2975    | 183.9632333  | 305.0795333 | 653.6494333 | 0.226644503 | 0.38312273  | 0.004189284  | 1.183501558 | 0.852812007 | 2.142554193 |
| 2946208 | HIST1H4B  | NM_003544 | 322.2168333 | 331.4187333 | 331.4187333  | 364.4592333 | 783.3782333 | 0.04507834  | 0.352131213 | 0.001364824  | 0.795036018 | 0.816473772 | 2.148426223 |
| 3976797 | SUV39H1   | NM_003173 | 282.7099    | 358.2509333 | 327.8508667  | 155.749667  | 334.9927333 | 0.037499019 | 0.377312178 | 0.004189284  | 1.267203353 | 1.159672394 | 2.150836629 |
| 2986597 | GMNN      | NM_015895 | 395.2293    | 478.5514    | 617.755      | 294.4304667 | 126.6645    | 0.477466915 | 0.06227941  | 0.002212941  | 1.210819643 | 1.09768974  | 2.152974195 |
| 2784113 | CENPA2    | NM_001237 | 1050.098667 | 1260.328    | 1190.437333  | 655.194667  | 272.6988333 | 0.344116265 | 0.477466915 | 0.002212941  | 1.180814359 | 1.034717889 | 2.162598066 |
| 2742384 | CENPA2    | NM_024322 | 445.7838333 | 512.8648    | 398.1014333  | 171.0835333 | 370.8944667 | 0.091129647 | 0.23495111  | 2.82258E+05  | 1.200270124 | 1.133709827 | 2.163498125 |
| 3330329 | POLA2     | NM_002689 | 586.4542667 | 616.2339333 | 600.1460333  | 205.895333  | 454.2794667 | 0.623095503 | 0.872066897 | 0.003518147  | 1.04720786  | 1.019668607 | 2.206637667 |
| 2336466 | RAD54L    | NM_003579 | 452.1888667 | 514.7398333 | 412.4078667  | 234.8604667 | 519.5264    | 0.42280881  | 0.824333678 | 0.004421327  | 1.138318992 | 0.912026303 | 2.213949403 |
| 2802987 | SLC16A14  | NM_152527 | 33.34987667 | 30.19904667 | 34.43953333  | 98.42508667 | 433.73235   | 0.701790609 | 0.009277525 | 0.009277525  | 1.326487065 | 1.032673484 | 2.215443651 |
| 4012142 | ERC6L     | NM_017869 | 199.2537333 | 264.3075    | 233.3594667  | 87.81596333 | 195.4033333 | 0.049424353 | 0.059110983 | 0.006700434  | 1.146432958 | 1.171167349 | 2.225148463 |
| 2515389 | HAT1      | NM_003842 | 599.3813333 | 686.5511333 | 531.5767333  | 213.4936667 | 475.2351667 | 0.13121551  | 0.585163588 | 9.52833E+06  | 1.061257338 | 0.88687569  | 2.22849891  |
| 2691575 | POLA1     | NM_198420 | 293.7427667 | 381.5243667 | 311.7366667  | 176.0994333 | 392.4351667 | 0.0017129   | 0.304948333 | 0.08345412   | 1.341445409 | 1.255334499 | 2.253597528 |
| 4012154 | RPS4X     | NM_001007 | 206.3439667 | 276.7991667 | 804.1762667  | 403.2758    | 911.7774    | 0.221822795 | 0.065167748 | 0.002964149  | 0.857717173 | 0.801798906 | 2.260927633 |
| 2946288 | HIST1H2BC | NM_003526 | 1002.965033 | 860.2603333 | 219.9670333  | 133.4456667 | 302.3565333 | 0.730219896 | 0.395951133 | 0.007609887  | 1.069362146 | 0.862449077 | 2.265765093 |
| 2425118 | SASS6     | NM_194292 | 255.0493    | 272.7400667 | 408.9750333  | 214.8856    | 489.4786667 | 0.316936433 | 0.233285898 | 0.002698277  | 1.151801336 | 0.876487951 | 2.277848617 |
| 2610241 | FANCD2    | NM_033084 | 466.6065667 | 537.4390667 | 410.7221333  | 302.3216    | 694.2774    | 0.0090114   | 0.165444835 | 0.00348666   | 1.256867344 | 1.157758641 | 2.296486258 |
| 3235799 | MCM10     | NM_018518 | 354.7562667 | 445.8815667 | 227.1937333  | 118.2363733 | 271.6148667 | 0.37303548  | 0.876350838 | 0.003233893  | 1.44472936  | 0.970535407 | 2.297219198 |
| 3563395 | POLE2     | NM_002692 | 234.0911333 | 267.9109667 | 1090.958     | 573.4472333 | 1318.57     | 0.046423278 | 0.065211139 | 0.002318648  | 1.199568432 | 1.195248971 | 2.298374595 |
| 2640855 | MCM2      | NM_004526 | 147.2340667 | 130.0977    | 189.6511667  | 669.9071333 | 1548.708    | 0.083829909 | 0.284679013 | 0.002045899  | 1.559595346 | 1.096515216 | 2.311824913 |
| 3097152 | MCM4      | NM_005914 | 231.2345667 | 223.2388667 | 185.3815667  | 75.5654333  | 175.5111    | 0.700087823 | 0.142248454 | 0.002739187  | 0.985421692 | 0.80161703  | 2.322633988 |
| 3742421 | ---       | ---       | 1521.558    | 1637.913333 | 1445.053     | 875.8663333 | 2037.942    | 0.118218237 | 0.42441304  | 0.000725016  | 1.076471178 | 0.949719301 | 2.326774704 |
| 3775842 | TYMS      | NM_001071 | 147.2340667 | 130.0977    | 103.7206733  | 351.2200333 | 816.2599    | 0.098141689 | 0.098992191 | 0.000149163  | 0.863611402 | 0.704461105 | 2.328764314 |
| 3726375 | VCAN      | NM_152463 | 289.3948333 | 348.3704667 | 305.7988667  | 108.65826   | 254.6397667 | 0.138722136 | 0.682096147 | 0.000437557  | 1.203958927 | 1.056823082 | 2.343482033 |
| 3866542 | HAS3      | NM_138612 | 49.88478333 | 39.94763    | 46.85702667  | 177.7698    | 416.691     | 0.03871493  | 0.343364149 | 1.49504E+05  | 0.800797905 | 0.935295767 | 2.349992062 |

|         |           |             |             |             |             |             |             |             |             |             |             |              |             |
|---------|-----------|-------------|-------------|-------------|-------------|-------------|-------------|-------------|-------------|-------------|-------------|--------------|-------------|
| 2856933 | SPC25     | NM_020675   | 196.38      | 278.2811333 | 204.7478333 | 126.0994667 | 295.9687    | 0.119870605 | 0.778029043 | 0.00827001  | 1.41705435  | 1.042610415  | 2.347123703 |
| 3290210 | ZWINT     | NM_032997   | 328.0401    | 387.8633867 | 338.4156667 | 238.5870667 | 560.3953    | 0.059763716 | 0.812202965 | 0.001032602 | 1.162365713 | 1.031628958  | 2.348808374 |
| 2407448 | E2F2      | NM_004091   | 180.9679667 | 196.0817667 | 149.3627333 | 83.47391667 | 196.3814667 | 0.429820542 | 0.222281808 | 0.002809673 | 1.083516438 | 0.825354542  | 2.352611567 |
| 2406420 | CLSPN     | NM_022111   | 231.2448667 | 296.8337667 | 260.0108    | 75.9639667  | 178.9123333 | 0.239501263 | 0.528890839 | 0.003442668 | 1.283633972 | 1.124399987  | 2.355237787 |
| 3504617 | C13orf3   | NM_145061   | 406.7902333 | 442.5425    | 349.7516333 | 250.4341333 | 593.8699    | 0.311762341 | 0.348121534 | 0.00610186  | 1.087868705 | 0.859783753  | 2.371361651 |
| 3817698 | UHRF1     | NM_01048201 | 333.7621    | 434.8324    | 450.0653333 | 230.0422667 | 549.4283667 | 0.009120636 | 0.018030085 | 0.00847057  | 1.302821381 | 1.348521387  | 2.38859209  |
| 3591704 | WDR76     | NM_024908   | 738.0179    | 915.4253    | 873.3787667 | 227.0425667 | 544.0380333 | 0.004487571 | 0.144052772 | 0.001026917 | 1.2403836   | 1.18341136   | 2.396193988 |
| 3757970 | PSMC3IP   | NM_013290   | 304.7224333 | 377.9939333 | 334.8975    | 185.1133667 | 444.4244    | 0.061663082 | 0.546589352 | 0.00048157  | 1.240453252 | 1.0983368428 | 2.400758002 |
| 3706753 | GS2       | NM_031965   | 159.7669333 | 190.7974    | 149.9118667 | 119.076     | 289.4191    | 0.101343181 | 0.435889352 | 0.002771702 | 1.194223335 | 0.93831598   | 2.430540999 |
| 3223687 | PHF19     | NM_015651   | 707.2321333 | 781.2680667 | 752.9626333 | 105.4282167 | 259.3654333 | 0.176153026 | 0.469114184 | 0.000620659 | 1.104684063 | 1.064661231  | 2.460114014 |
| 3689880 | RAB43     | NM_198490   | 441.6254667 | 518.7451333 | 457.2096667 | 226.7267333 | 560.6842333 | 0.065914086 | 0.80106643  | 0.005799012 | 1.174628856 | 1.035286273  | 2.47295158  |
| 3433747 | RFC5      | NM_181578   | 598.4151667 | 647.7016333 | 603.0759667 | 331.4097667 | 820.0487333 | 0.468409711 | 0.941952454 | 0.002032719 | 1.08236166  | 1.007786573  | 2.474425366 |
| 3703112 | GINS2     | NM_016095   | 249.9806    | 309.8242    | 287.5101333 | 194.4946333 | 486.878     | 0.070018437 | 0.193869267 | 0.000353295 | 1.239392977 | 1.150129783  | 2.503297863 |
| 2412799 | ORC1L     | NM_004153   | 216.8323333 | 284.2087667 | 269.8156333 | 187.8772    | 472.0685    | 0.204049191 | 0.114147003 | 0.005859562 | 1.218488341 | 1.244346308  | 2.513619807 |
| 3337749 | GAL       | NM_015973   | 35.34621    | 45.84003333 | 28.27731667 | 374.071667  | 962.4965667 | 0.121856864 | 0.437919453 | 0.000868932 | 1.286886804 | 0.743428663  | 2.573031154 |
| 2800116 | HIST1H2BO | NM_003527   | 124.6236333 | 119.8656    | 88.47096333 | 97.51628    | 251.9686333 | 0.53058422  | 0.071956391 | 0.000663326 | 0.961933405 | 0.709686868  | 2.563864287 |
| 3658925 | OR6L      | NM_014521   | 234.1513    | 278.9654    | 223.6377667 | 130.5736667 | 338.2837667 | 0.209825441 | 0.689399977 | 0.001341162 | 1.191389489 | 0.955099402  | 2.590631262 |
| 3844147 | MC6L      | NM_006739   | 652.5582333 | 666.2827    | 863.5756333 | 478.1359667 | 1242.457333 | 0.006749276 | 0.069059283 | 0.003574545 | 1.323277815 | 1.014564445  | 2.598643971 |
| 2946219 | HIST1H2AB | NM_003513   | 236.1985    | 230.0604333 | 239.6386    | 225.0595667 | 587.1046    | 0.779212231 | 0.683581313 | 0.000328936 | 0.974013101 | 1.077661925  | 2.609663158 |
| 3936913 | CDCAF1    | NM_003504   | 474.8590333 | 562.0423333 | 511.7375    | 144.8024667 | 398.7303    | 0.064652647 | 0.451526554 | 0.000150846 | 1.183598276 | 1.077661925  | 2.757423917 |
| 2947095 | HIST1H3J  | NM_003536   | 631.9587    | 468.9033333 | 480.0956333 | 467.6824667 | 1304.237667 | 0.006734194 | 0.013056213 | 0.000225018 | 0.741984141 | 0.759599891  | 2.788724743 |
| 2900051 | HIST1H3H  | NM_003536   | 479.9565667 | 431.5048667 | 414.3518333 | 224.9106333 | 673.6620333 | 0.145257595 | 0.231551758 | 0.000308195 | 0.899048824 | 0.863311104  | 2.995243148 |
| 3150715 | DCC1      | NM_024094   | 245.1782    | 302.3967    | 260.4831667 | 129.7956    | 388.8669333 | 0.088501151 | 0.742833458 | 5.92781E-05 | 1.233375153 | 1.062423848  | 2.995994728 |
| 2900059 | HIST1H2BM | NM_003521   | 781.9955667 | 566.8416333 | 591.6437667 | 1295.925    | 3831.926667 | 0.007022322 | 0.020846871 | 9.46575E-06 | 0.724865533 | 0.756581996  | 3.034089616 |
| 3940952 | ZNF331    | NM_018555   | 186.6743667 | 193.5371667 | 188.1610333 | 28.51564667 | 171.7591667 | 0.83811102  | 0.943414057 | 0.003444643 | 1.036763484 | 1.007963957  | 6.023330583 |
