# Supplementary material
Source: PubMed Central journal article supplement (PMC2746047)
Supplement: NIHMS138150-supplement-Supp_Fig_3.pdf [file NIHMS138150-supplement-Supp_Fig_3.pdf]

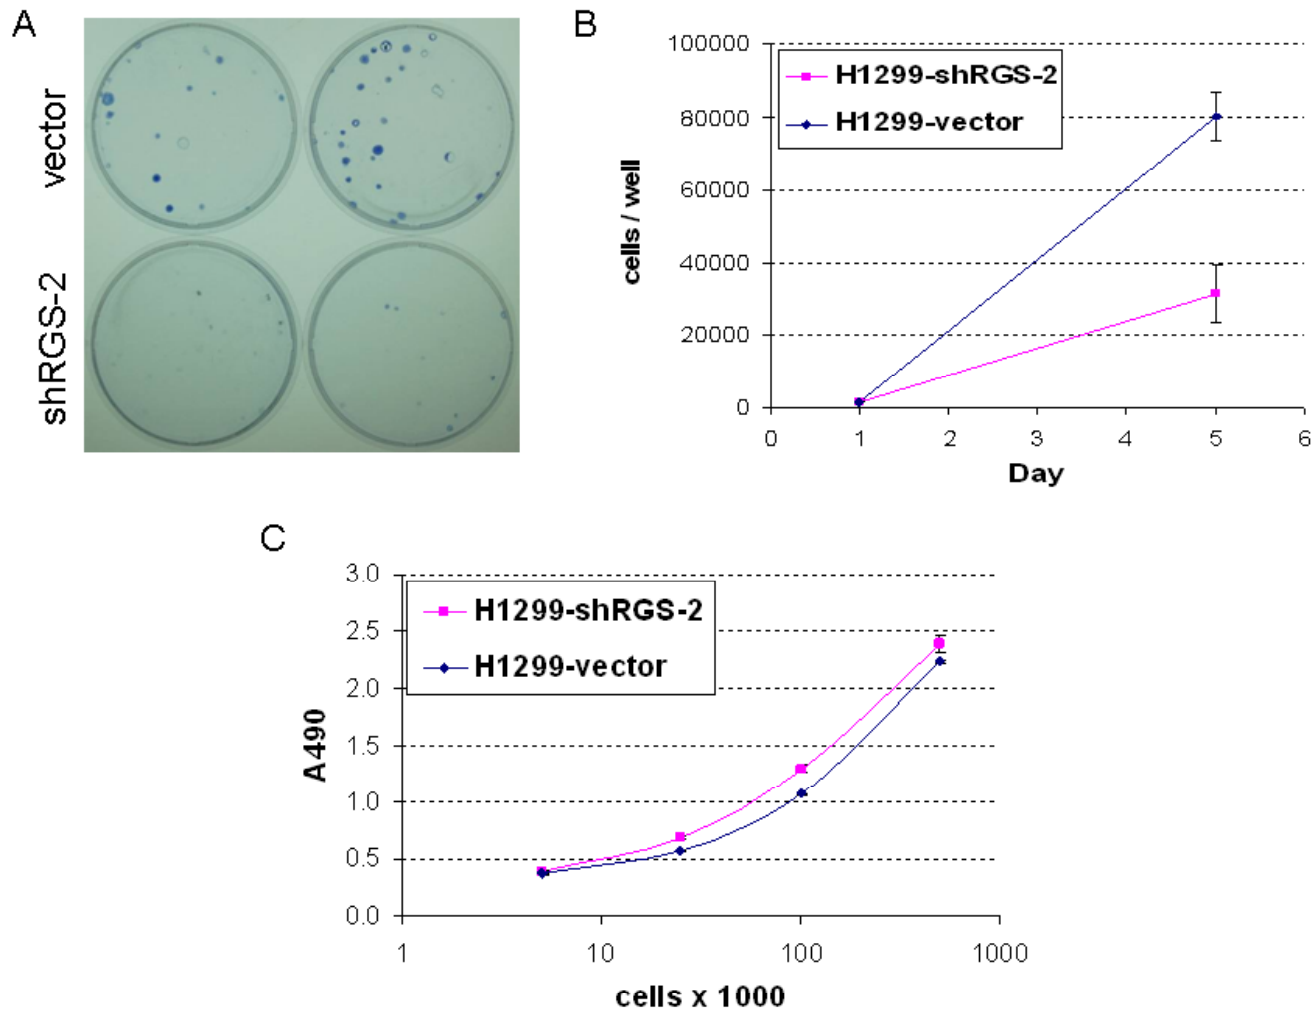

**Supplemental Figure S3. Knockdown of RGS17 inhibits cell proliferation as evidenced by decreased cell numbers and decreased colony formation.** A, Colony formation assay on H1299 cells with vector or RGS17 knockdown. H1299 were plated at 100 cells per plate and resulting colonies of growth were stained with crystal violet after 14 days in culture. B, Cell counts were performed at days 1 and 5 in 12 well tissue culture dishes inoculated with 1000 H1299 cells containing vector or RGS17 knockdown per well. Cell proliferation as measured by cell counts correlates with MTT proliferation assays. C, H1299 cells with vector or RGS17 knockdown were counted and  $5 \times 10^3$  to  $1 \times 10^6$  cells were aliquoted in 1 ml growth media. MTT assay on these cell suspensions shows that MTT assay values correlate with cell numbers. Slightly higher MTT values at higher cell numbers for H1299-shRGS-2 compared to H1299-vector indicate that if there are differences in MTT values not attributable to differences in cell numbers, they are such that would be interpretable as an even larger difference in cell proliferation between H1299-vector and H1299-shRGS.
