# Supplementary material
Source: PubMed Central journal article supplement (PMC2746047)
Supplement: NIHMS138150-supplement-Supp_Fig_4.pdf [file NIHMS138150-supplement-Supp_Fig_4.pdf]

| Receptor mediated signal transduction |             |                                                           |                                                                                  |
|---------------------------------------|-------------|-----------------------------------------------------------|----------------------------------------------------------------------------------|
| Gene                                  | Accession # | Description                                               | GO Function                                                                      |
| RIPK4                                 | NM_020639   | Receptor-interacting serine/threonine kinase 4            | signal transduction, protein phosphorylation, PKC associated NFkB activation     |
| KCIP-1                                | NM_003406   | protein kinase C inhibitor protein-1                      | anti-apoptosis/signal transduction/PKC signaling                                 |
| MAP2K4                                | NM_003010   | Mitogen activated kinase kinase 4                         | Jnk kinase pathway/protein phosphorylation/signal transduction                   |
| EIF4EBP2                              | NM_004096   | Translation initiation factor 4E binding protein 2        | cAMP mediated signaling/insulin receptor signaling                               |
| KHDRBS1                               | NM_006559   | KH domain, RNA binding, signal transduction associated 1  | G2/M transition/cell cycle control/cell proliferation/receptor linked signaling  |
| TMEMPAI                               | NM_020182   | Transmembrane, prostate androgen induced                  | androgen receptor signaling                                                      |
| TNFRSF21                              | NM_014452   | Transforming Growth Factor superfamily 21                 | signal transduction/apoptosis/androgen receptor signaling                        |
| PTK2                                  | NM_153831   | Protein tyrosine kinase 2 / FRNK                          | Integrin mediated signaling/protein phosphorylation                              |
| ITGA2                                 | NM_002203   | Integrin alpha 2                                          | cell adhesion, cell matrix adhesion, integrin mediated signaling                 |
| PCDH7                                 | NM_032456   | Protocadherin 7                                           | cell adhesion                                                                    |
| PCDH9                                 | NM_203487   | Protocadherin 9                                           | cell adhesion                                                                    |
| PCDHGC3                               | NM_002588   | Protocadherin gamma C                                     | cell-cell adhesion                                                               |
| ITGB8                                 | NM_002214   | Integrin beta 8                                           | cell adhesion, cell matrix adhesion, integrin mediated signaling                 |
| FN1                                   | NM_212482   | Fibronectin                                               | cell adhesion, cell migration, wound healing, receptor tyrosine kinase signaling |
| ANK1                                  | NM_020476   | Ankryn1                                                   | cell motility, cell polarity, signal transduction                                |
| ARL4C                                 | NM_005737   | ADP ribosylation factor-like                              | small GTPase signaling                                                           |
| INS-IGF2                              | NR_003512   | Insulin like growth factor 2                              | insulin like growth factor                                                       |
| TGFB1                                 | NM_000358   | Transforming Growth Factor Beta induced                   | cell adhesion, cell proliferation                                                |
| TNC                                   | NM_002160   | Tenascin C                                                | cell adhesion, signal transduction                                               |
| BOC                                   | NM_033254   | Brother of CDO(cell adhesion down regulated by oncogenes) | cell adhesion, myoblast differentiation                                          |
| NPAS2                                 | NM_002518   | neuronal PAS domain 2                                     | transcriptional regulation/signal transduction                                   |
| SORCS2                                | NM_020777   | Sortilin-related VPS10 domain containing receptor 2       | neuropeptide signaling pathways                                                  |
| SRPX                                  | NM_006307   | Sushi repeat containing protein x-linked                  | cell adhesion                                                                    |
| NR2F1                                 | NM_005654   | Nuclear receptor 2F1                                      | CNS development/neuron migration/signal transduction/transcriptional regulation  |
| ARRB1                                 | NM_020251   | Arrestin beta 1                                           | signal transduction                                                              |
| TGM2                                  | NM_004613   | Transglutaminase 2                                        | cell adhesion/protein crosslinking/apoptosis                                     |
| SPAN1                                 | NM_005727   | Tetraspanin 1                                             | cell adhesion/signal transduction/cell motility/cell proliferation               |
| PRICKLE1                              | NM_153026   | Prickle1 homolog                                          | signaling regulation                                                             |
| TNFSF5IP1                             | NM_020232   | Proteasome assembly chaperone 2                           | proteasome assembly                                                              |
| HNT                                   | NM_016522   | Neurotrimin                                               | cell adhesion/neuron recognition                                                 |
| FOXO4                                 | NM_005938   | Forkhead Bbox O4                                          | transcriptional regulation/insulin receptor signaling/cell cycle arrest          |

| Brain/CNS associated genes |           |                                                     |                                                                                 |
|----------------------------|-----------|-----------------------------------------------------|---------------------------------------------------------------------------------|
| ANK1                       | NM_020476 | Ankryn1                                             | cell motility, cell polarity, signal transduction                               |
| MAP2                       | NM_002374 | Microtubule associated protein 2                    | brain inhibition of microtubule depolymerization                                |
| PCDH7                      | NM_032456 | Protocadherin 7                                     | cell adhesion                                                                   |
| TMEM158                    | NM_015444 | Ras induced senescence 1                            | Ras induced senescence                                                          |
| PCDH9                      | NM_203487 | Protocadherin 9                                     | cell adhesion                                                                   |
| CCNA1                      | NM_003914 | Cyclin A1                                           | cell cycle                                                                      |
| NPAS2                      | NM_002518 | neuronal PAS domain 2                               | transcriptional regulation/signal transduction                                  |
| CBLN2                      | NM_182511 | Cerebellin 2 precursor                              | neuromodulation                                                                 |
| ENC1                       | NM_003633 | Ectodermal neural cortex                            | CNS development                                                                 |
| SORCS2                     | NM_020777 | Sortilin-related VPS10 domain containing receptor 2 | neuropeptide signaling pathways                                                 |
| SRPX                       | NM_006307 | Sushi repeat containing protein x-linked            | cell adhesion                                                                   |
| SEMA3E                     | NM_012431 | Semaphorin 3E                                       | CNS development/cell motility/cell differentiation                              |
| SEMA3A                     | NM_006080 | Semaphorin 3A                                       | CNS development/cell differentiation                                            |
| NR2F1                      | NM_005654 | Nuclear receptor 2F1                                | CNS development/neuron migration/signal transduction/transcriptional regulation |
| FOXP2                      | NM_148899 | Forkhead box P2                                     | CNS development/transcriptional regulation                                      |
| MEF2C                      | NM_002397 | Myocyte enhancer factor 2C                          | muscle development/nervous system development/transcriptional regulation        |
| PRICKLE1                   | NM_153026 | Prickle1 homolog                                    | signaling regulation                                                            |
| PTK2                       | NM_153831 | Protein tyrosine kinase 2 / FRNK                    | Integrin mediated signaling/protein phosphorylation                             |
| PCDHGC3                    | NM_002588 | Protocadherin gamma C                               | cell-cell adhesion                                                              |
| RTN3                       | NM_006054 | Reticulon 3                                         | apoptosis/stress response/vesicle mediated transport                            |
| KCIP-1                     | NM_003406 | Protein kinase C inhibitor protein-1                | anti-apoptosis/signal transduction/PKC signaling                                |
| HNT                        | NM_016522 | Neurotrimin                                         | cell adhesion/neuron recognition                                                |

| Putative CREB target genes (Have conserved CRE, or bind CREB in ChIP on Chip) |              |                                                          |                                                                                  |
|-------------------------------------------------------------------------------|--------------|----------------------------------------------------------|----------------------------------------------------------------------------------|
|                                                                               |              |                                                          | <b>bold</b> = conserved CRE and high CREB binding score                          |
| <b>RIPK4</b>                                                                  | NM_020639    | Receptor-interacting serine/threonine kinase 4           | signal transduction, protein phosphorylation, PKC associated NFkB activation     |
| <b>NR2F1</b>                                                                  | NM_005654    | Nuclear receptor 2F1                                     | CNS development/neuron migration/signal transduction/transcriptional regulation  |
| <b>FOXP2</b>                                                                  | NM_148899    | Forkhead box P2                                          | CNS development/transcriptional regulation                                       |
| <b>TM9SF2</b>                                                                 | NM_004800    | Transmembrane 9 superfamily 2                            | transport                                                                        |
| <b>TADA3L</b>                                                                 | NM_006354    | Transcriptional adapter 3-like                           | transcriptional regulation/p53 mediated apoptosis                                |
| KCIP-1                                                                        | NM_003406    | protein kinase C inhibitor protein-1                     | anti-apoptosis/signal transduction/PKC signaling                                 |
| PCDH7                                                                         | NM_032456    | Protocadherin 7                                          | cell adhesion                                                                    |
| PCDH9                                                                         | NM_203487    | Protocadherin 9                                          | cell adhesion                                                                    |
| FN1                                                                           | NM_212482    | Fibronectin                                              | cell adhesion, cell migration, wound healing, receptor tyrosine kinase signaling |
| ARL4C                                                                         | NM_005737    | ADP ribosylation factor-like                             | small GTPase signaling                                                           |
| ARRB1                                                                         | NM_020251    | Arrestin beta 1                                          | signal transduction                                                              |
| PRICKLE1                                                                      | NM_153026    | Prickle1 homolog                                         | signaling regulation                                                             |
| TNFSF5IP1                                                                     | NM_020232    | Proteasome assembly chaperone 2                          | proteasome assembly                                                              |
| NR2F1                                                                         | NM_005654    | Nuclear receptor 2F1                                     | CNS development/neuron migration/signal transduction/transcriptional regulation  |
| MAEA                                                                          | NM_001017405 | Macrophage erythroblast attacher                         | cell cycle/cell division/apoptosis/cell adhesion                                 |
| RNF182                                                                        | NM_152737    | Ring finger protein 182                                  | metal ion binding                                                                |
| FDFT1                                                                         | NM_004462    | farnesyl-diphosphate farnesyltransferase 1               | cholesterol/isoprenoid synthesis                                                 |
| MAP2K4                                                                        | NM_003010    | Mitogen activated kinase kinase 4                        | Jnk kinase pathway/protein phosphorylation/signal transduction                   |
| KHDRBS1                                                                       | NM_006559    | KH domain, RNA binding, signal transduction associated 1 | G2/M transition/cell cycle control/cell proliferation/receptor linked signaling  |
| TNFRSF21                                                                      | NM_014452    | Transforming Growth Factor superfamily 21                | signal transduction/apoptosis/androgen receptor signaling                        |
| PTPRO                                                                         | NM_000667    | Protein tyrosine phosphatase receptor type O             | protein dephosphorylation                                                        |
| PPME1                                                                         | NM_016147    | Protein phosphatase methyltransferase 1                  | amino acid demethylation-PP2A                                                    |
| XRCC5                                                                         | NM_021141    | X-ray repair complementing defective repair in CHO cells | double strand break repair/NHEJ                                                  |
| LGMN                                                                          | NM_005606    | Legumain                                                 | proteolysis                                                                      |

Supplementary Table S1. Genes that were differentially expressed with RGS17 knockdown and genes identified by an analysis of 6 published array datasets as co-expressed with RGS17 in lung tumors were classified based on function by searching the Gene Ontology Annotation from the European Bioinformatics Institute (<http://www.ebi.ac.uk/GOA/>) and evaluated as putative CREB responsive genes using the Salk Institute CREB Target Database. Genes falling into the prevalent functional categories are presented.
