# Supplementary material
Source: PubMed Central journal article supplement (PMC2746047)

A

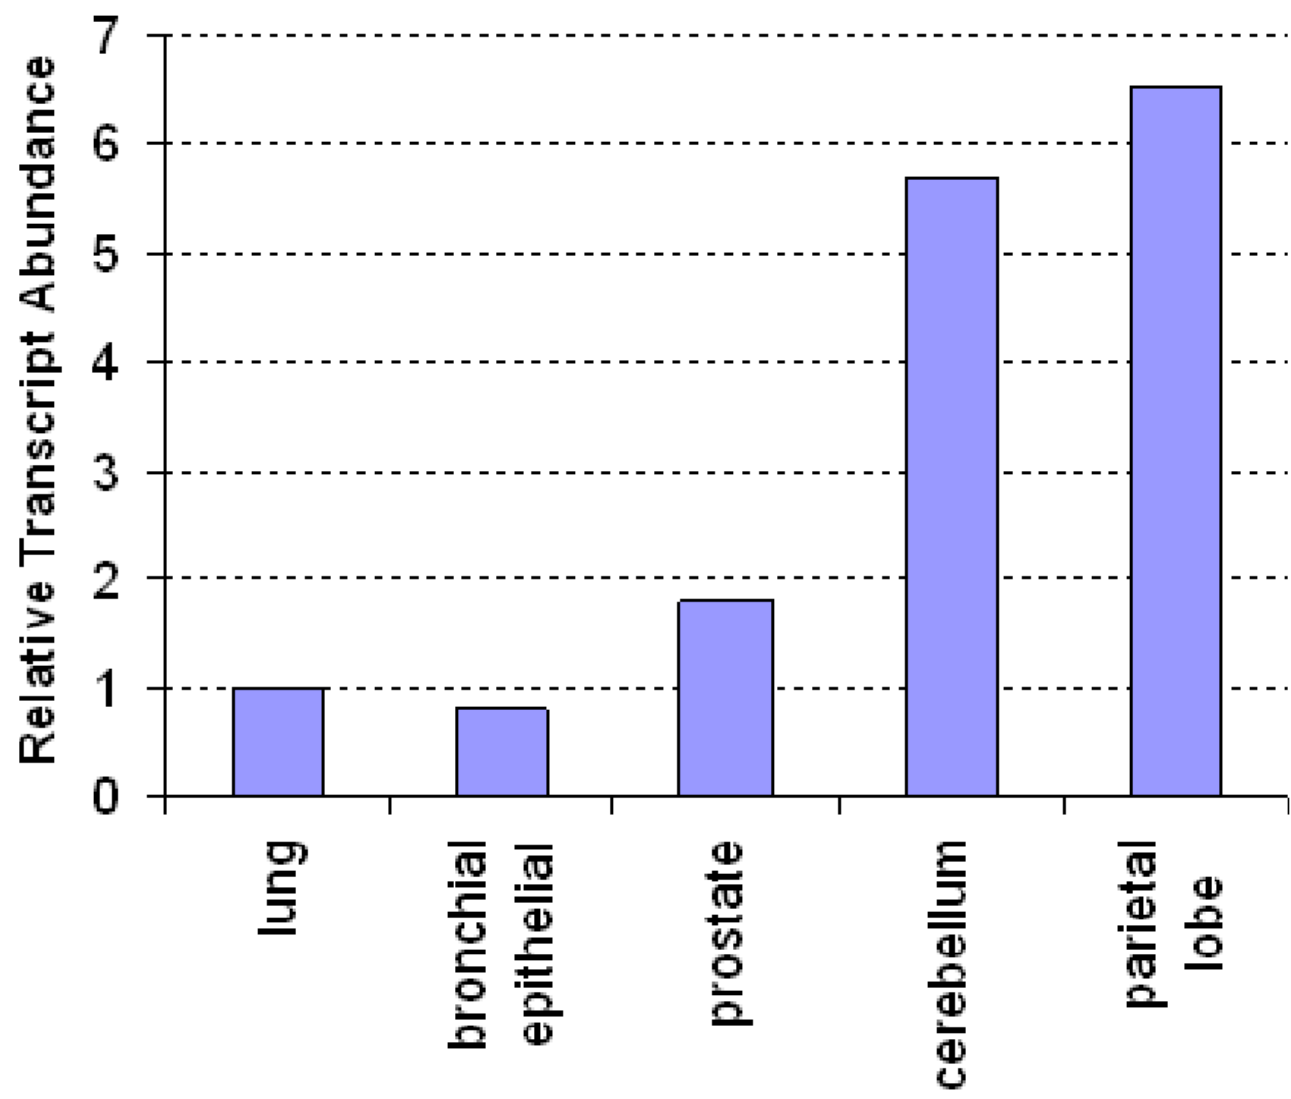

B

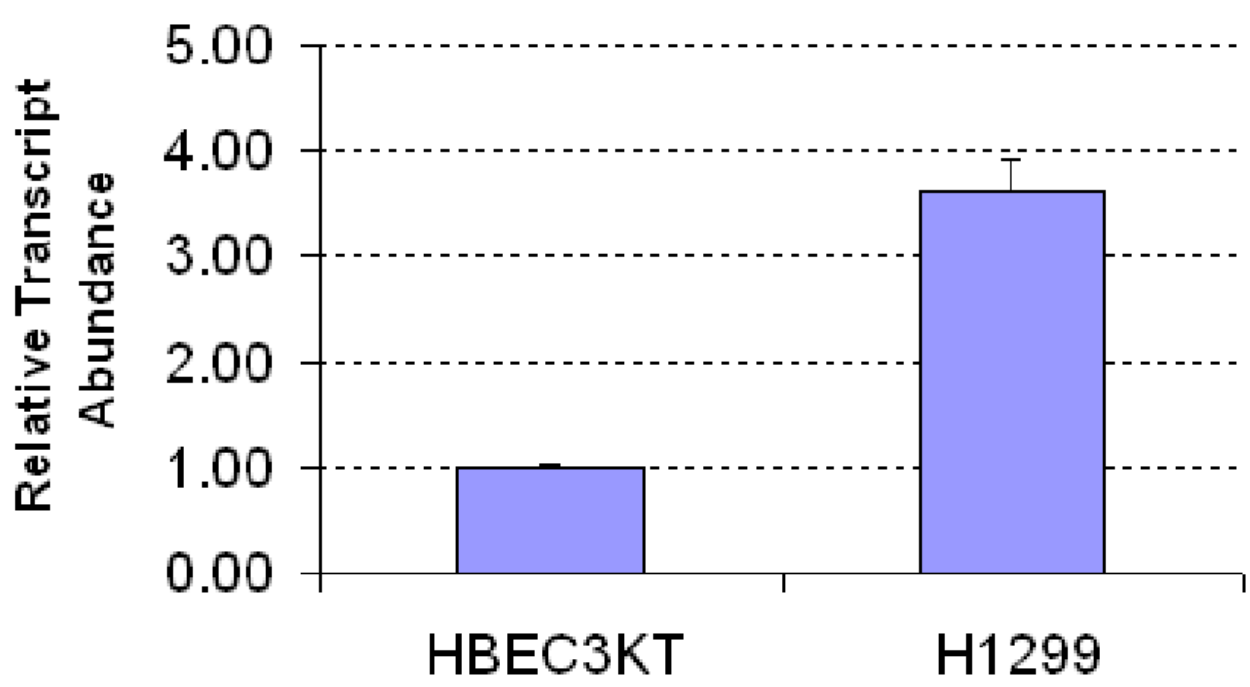

Supplement: NIHMS138150-supplement-Supp_Fig_1.pdf [file NIHMS138150-supplement-Supp_Fig_1.pdf]
